# Supplementary material for: Synthesis of novel pyridine and pyrazolyl pyridine conjugates with potent cytotoxicity against HepG2 cancer cells as PIM-1 kinase inhibitors and caspase activators
Source: Royal Society of Chemistry journal article supplement (doi:10.1039/d4ra07963a), 2024-01-01
Supplement: d4ra07963a1.pdf [file d4ra07963a1.pdf]

## Synthesis of novel pyridine and pyrazolyl pyridine conjugates with potent cytotoxicity against HepG2 cancer cells as PIM-1 kinase inhibitors and caspase activators

Mohamed S. Nafie<sup>1,2</sup>, Ahmed Hamza<sup>2,3</sup>, Ahmed H. Moustafa<sup>4</sup>, Hassan A. El-Sayed<sup>4,5</sup>, Samir M. El Rayes<sup>2</sup>,  
Hesham A. Morsy<sup>6</sup>, Ahmed Aboelmaged<sup>2</sup>

<sup>1</sup>Department of Chemistry, College of Sciences, University of Sharjah, (P. O. 27272) ,Sharjah, United Arab Emirates.

<sup>2</sup>Department of Chemistry, Faculty of Science, Suez Canal University, Ismailia, 41522 Egypt

<sup>3</sup>Department of Community Health, Community Health, Diwaniyah Technical Institute, Al-furat Al-Awsat Technical University, Kufa, Iraq

<sup>4</sup>Department of Chemistry, Faculty of Science, Zagazig University, Zagazig, 44519 Egypt

<sup>5</sup> Alzahrawi university college, Karbala, Iraq

<sup>6</sup>Higher Institution of Engineering & Modern Technology, Elmag, Cairo, Egypt

---

\*Corresponding author: Mohamed S. Nafie; [mohamed\\_nafie@science.suez.edu.eg](mailto:mohamed_nafie@science.suez.edu.eg) Hassan A. El-Sayed; [hasaneg@gmail.com](mailto:hasaneg@gmail.com), Ahmed H. Moustafa; [ah\\_hu\\_mostafa@yahoo.com](mailto:ah_hu_mostafa@yahoo.com)

### List of contents

1. Characterization of tested compounds using NMR and IR.
2. Flow cytometry analysis of Annexin V/PI staining.

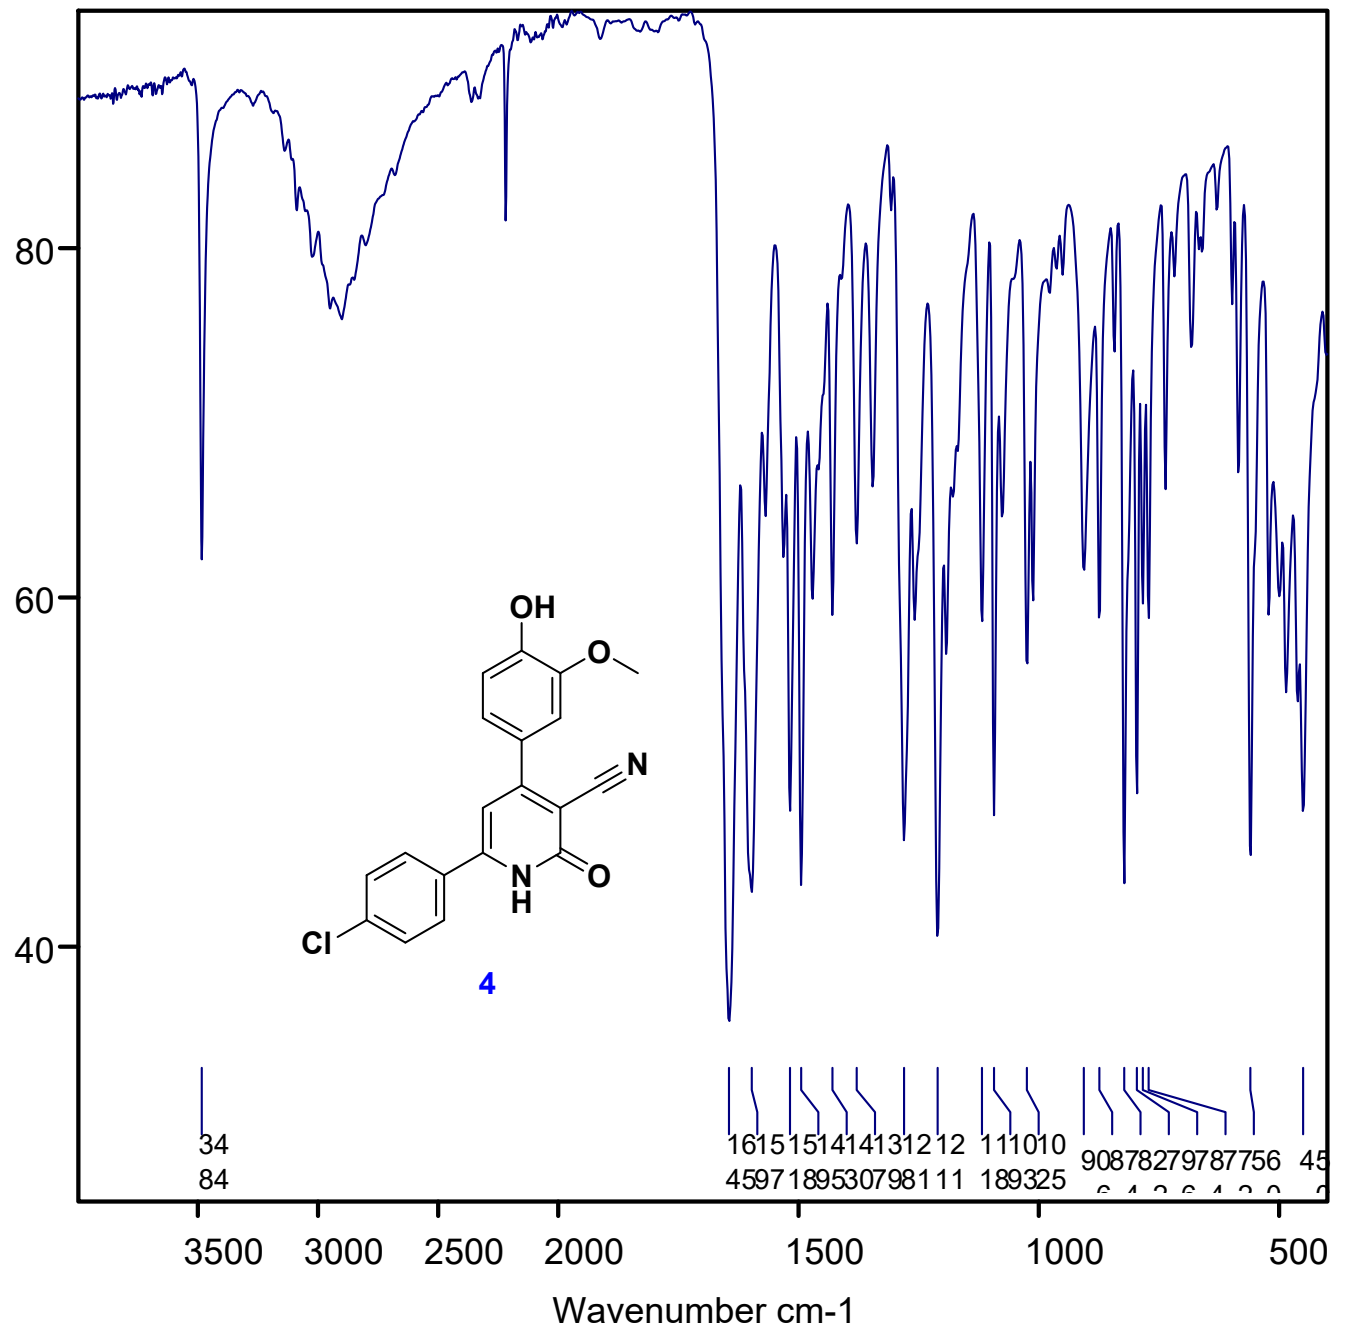

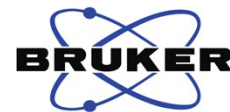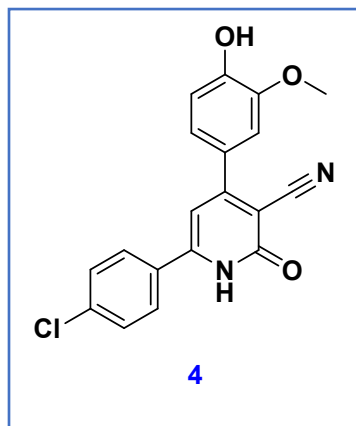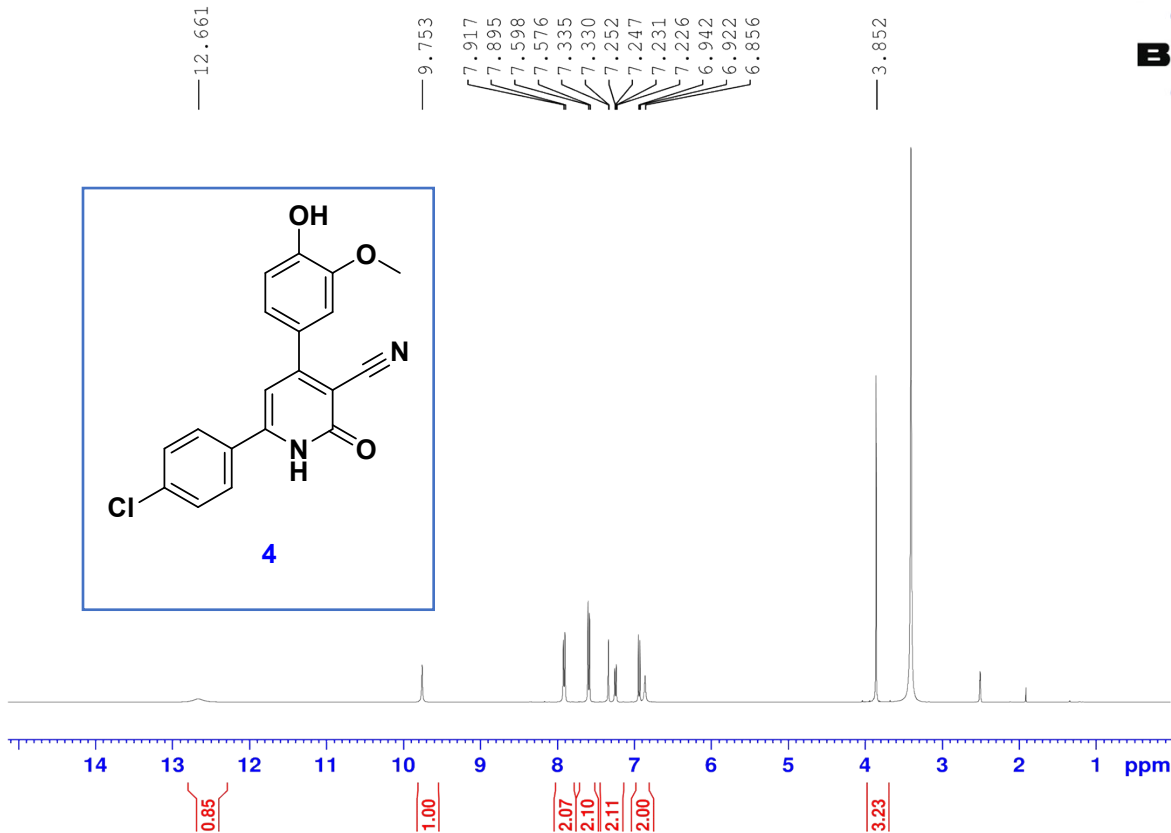

```

Current Data Parameters
NAME      D-ahmed-35-1H
EXPNO    10
PROCNO   1

F2 - Acquisition Parameters
Date_    20221002
Time     10.57
INSTRUM spect
PROBHD   5 mm PABBO BB/
PULPROG zg30
TD       65536
SOLVENT  DMSO
NS       16
DS       2
SWH      8012.820 Hz
FIDRES   0.122266 Hz
AQ       4.0894465 sec
RG       89
DM       62.400 usec
DE       6.50 usec
TE       298.2 K
D1       1.0000000 sec
TDO      1

===== CHANNEL f1 =====
SF01    400.1324710 MHz
NUC1     1H
P1       15.00 usec
PLW1    10.39999962 W

F2 - Processing parameters
SI       65536
SF       400.1300034 MHz
WDW      EM
SSB      0
LB       0.30 Hz
GB       0
PC       1.00
    
```

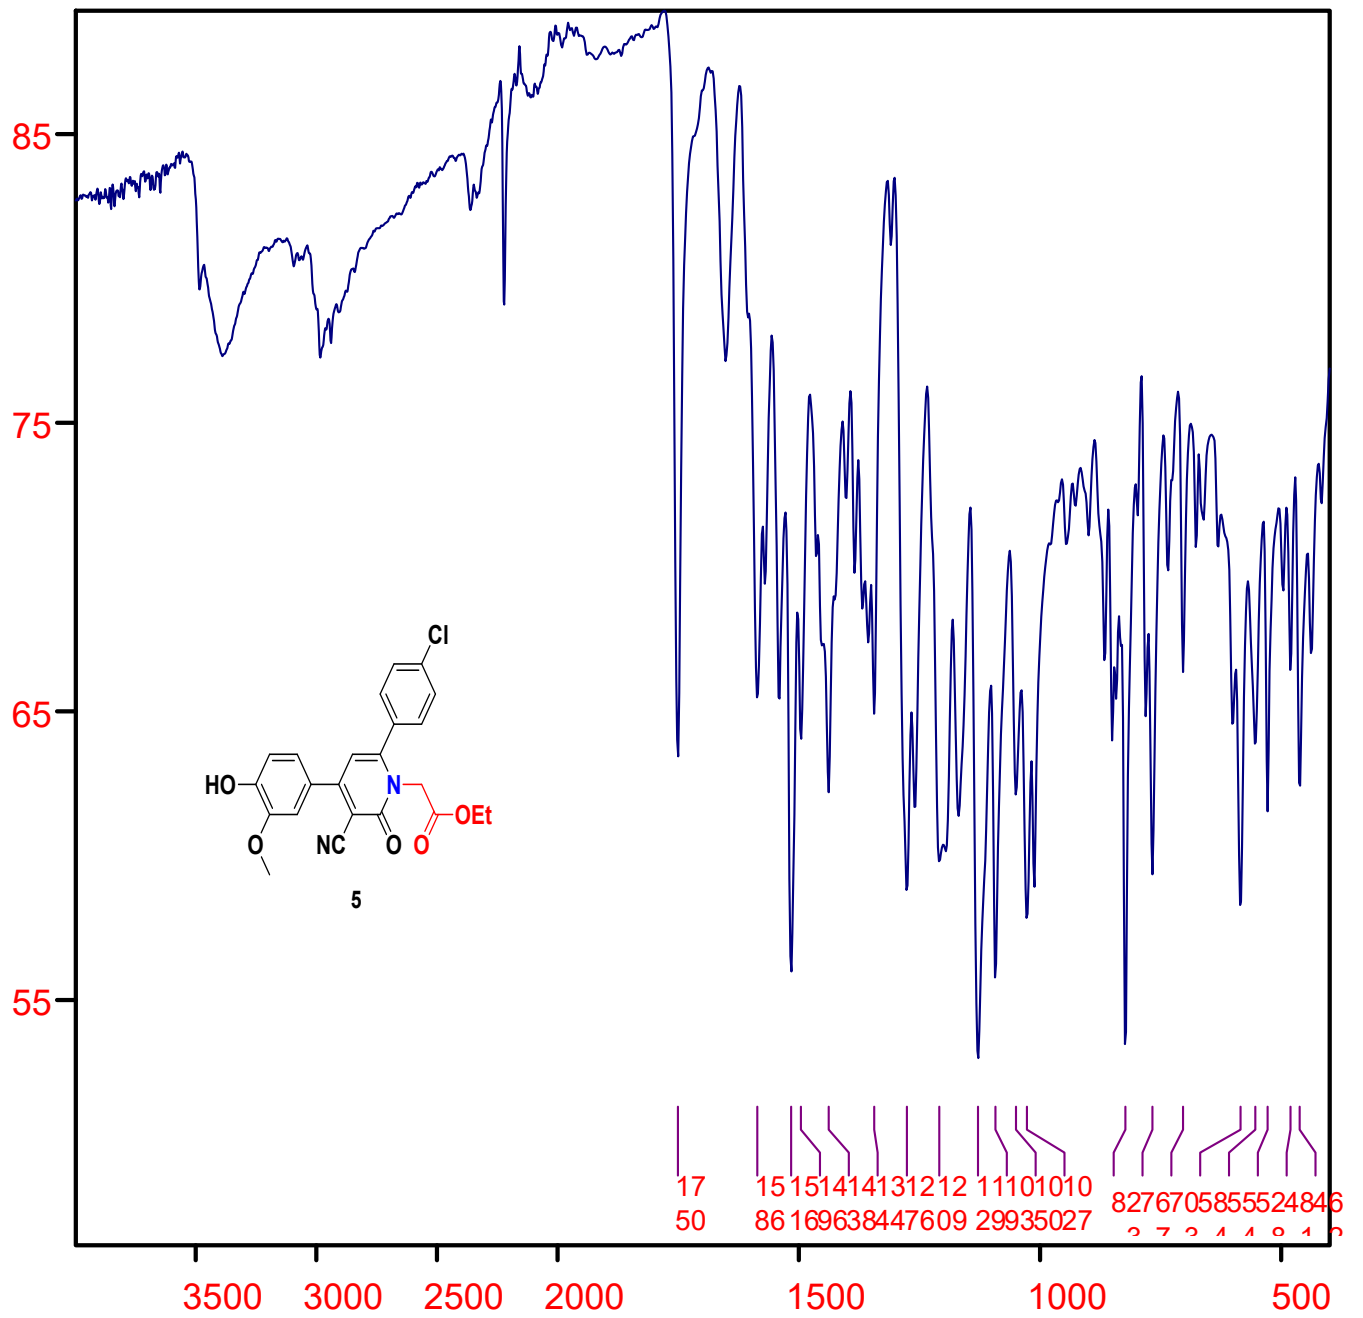

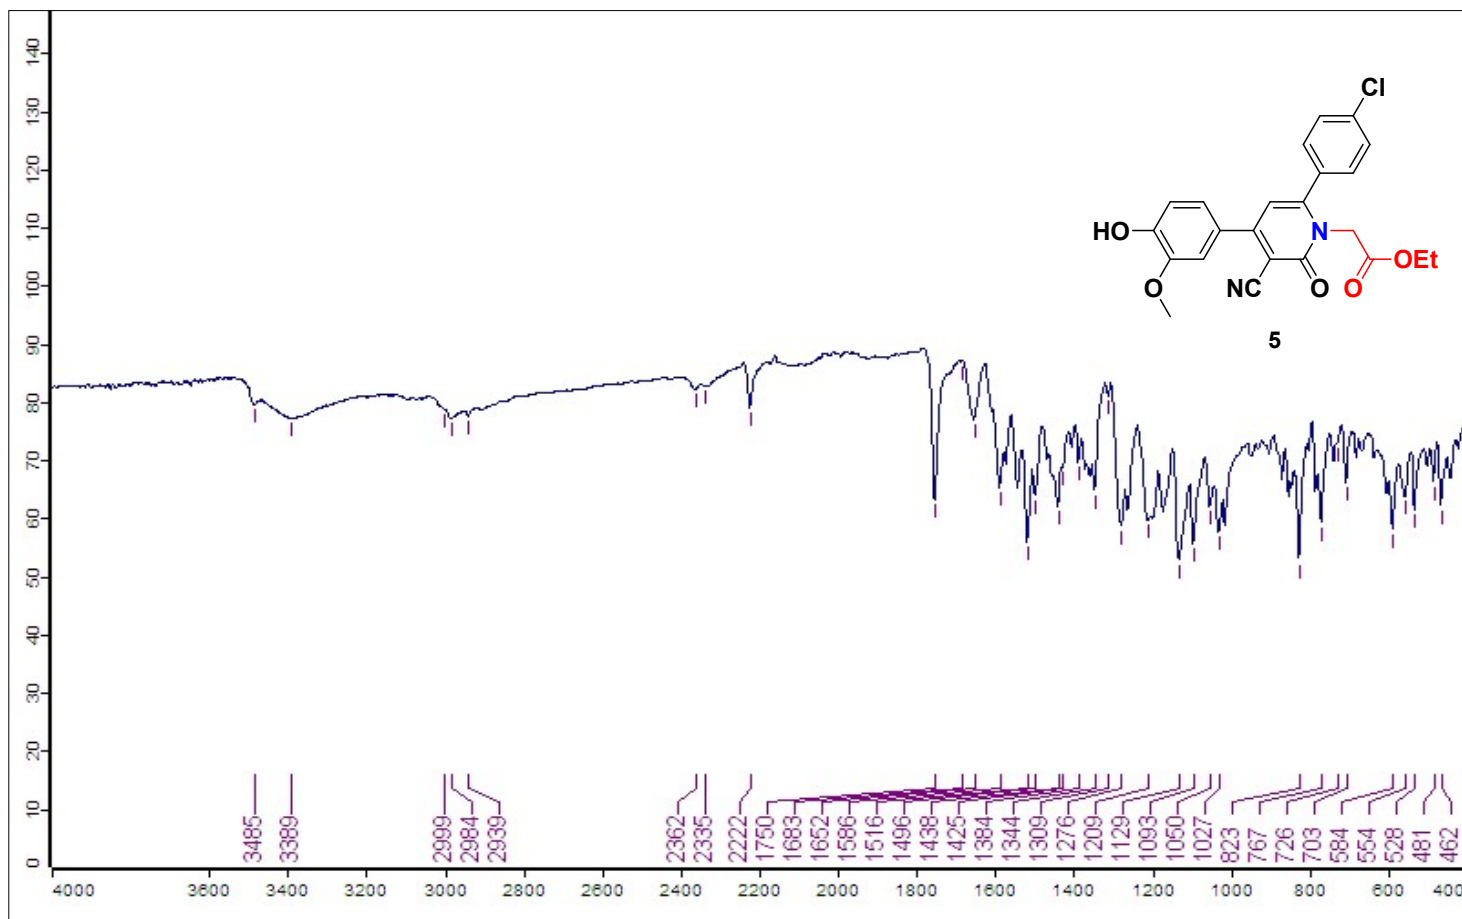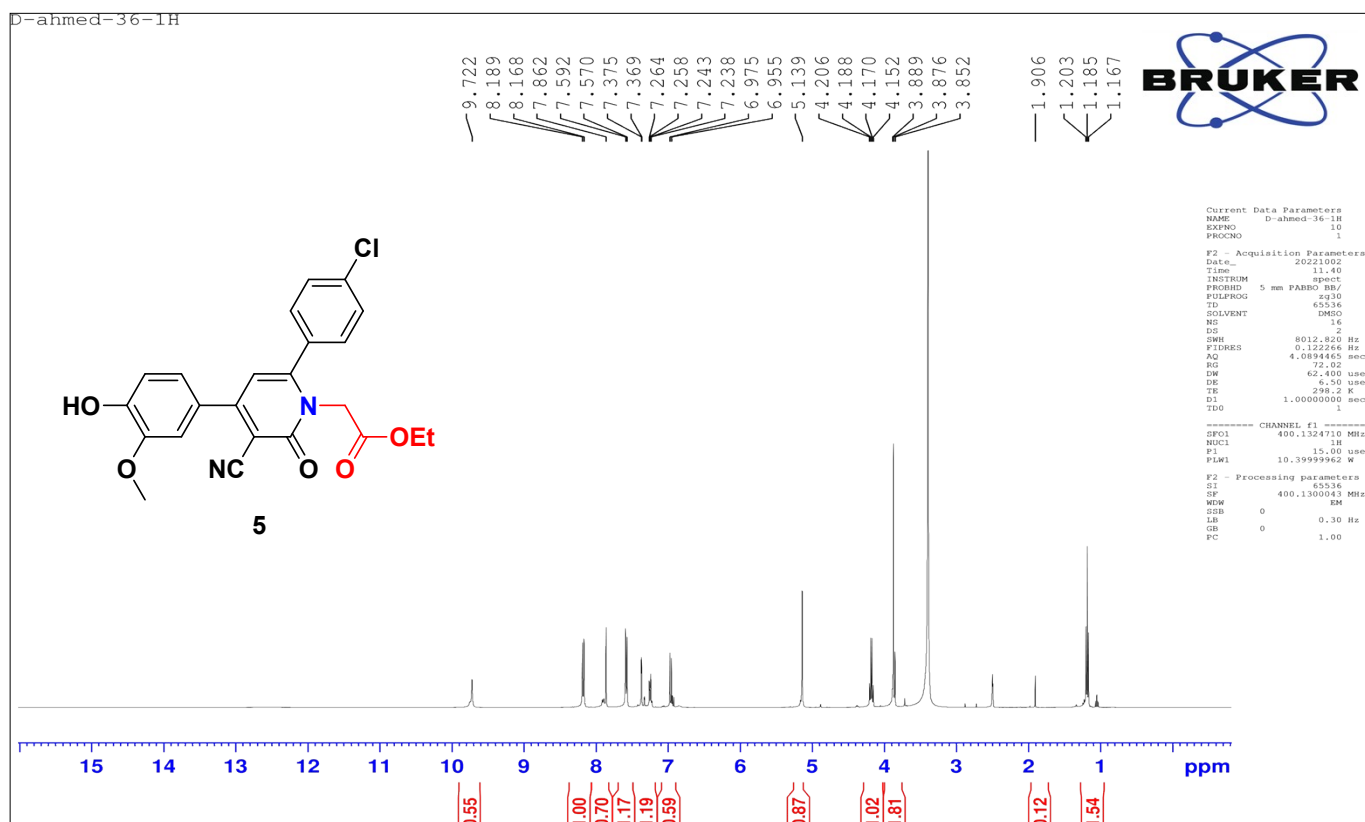

**BRUKER**

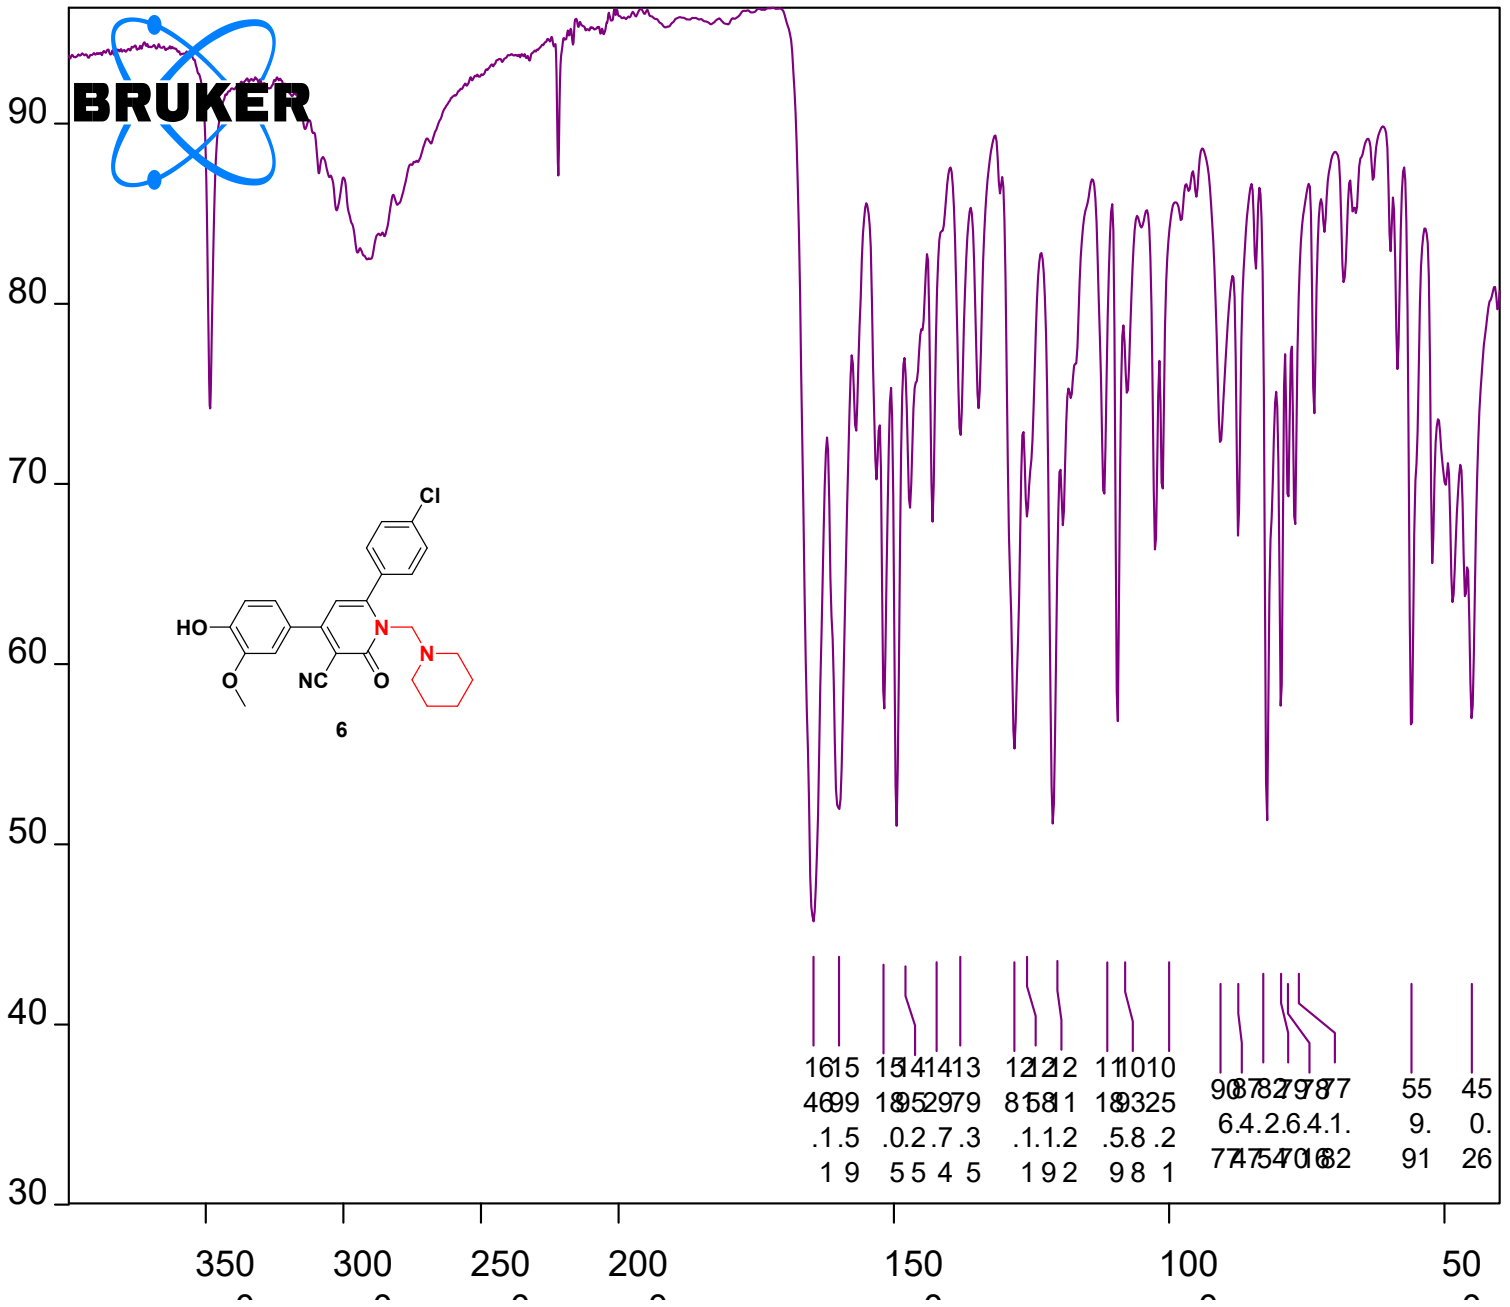

|      |      |      |      |       |     |     |     |     |    |    |
|------|------|------|------|-------|-----|-----|-----|-----|----|----|
| 1615 | 1541 | 1413 | 1222 | 11010 | 987 | 877 | 877 | 877 | 55 | 45 |
| 469  | 185  | 299  | 858  | 183   | 64  | 26  | 41  | 1   | 9  | 0  |
| .15  | .02  | .73  | .11  | .25   | 77  | 54  | 16  | 2   | 91 | 26 |
| 19   | 55   | 45   | 192  | 98    | 1   |     |     |     |    |    |

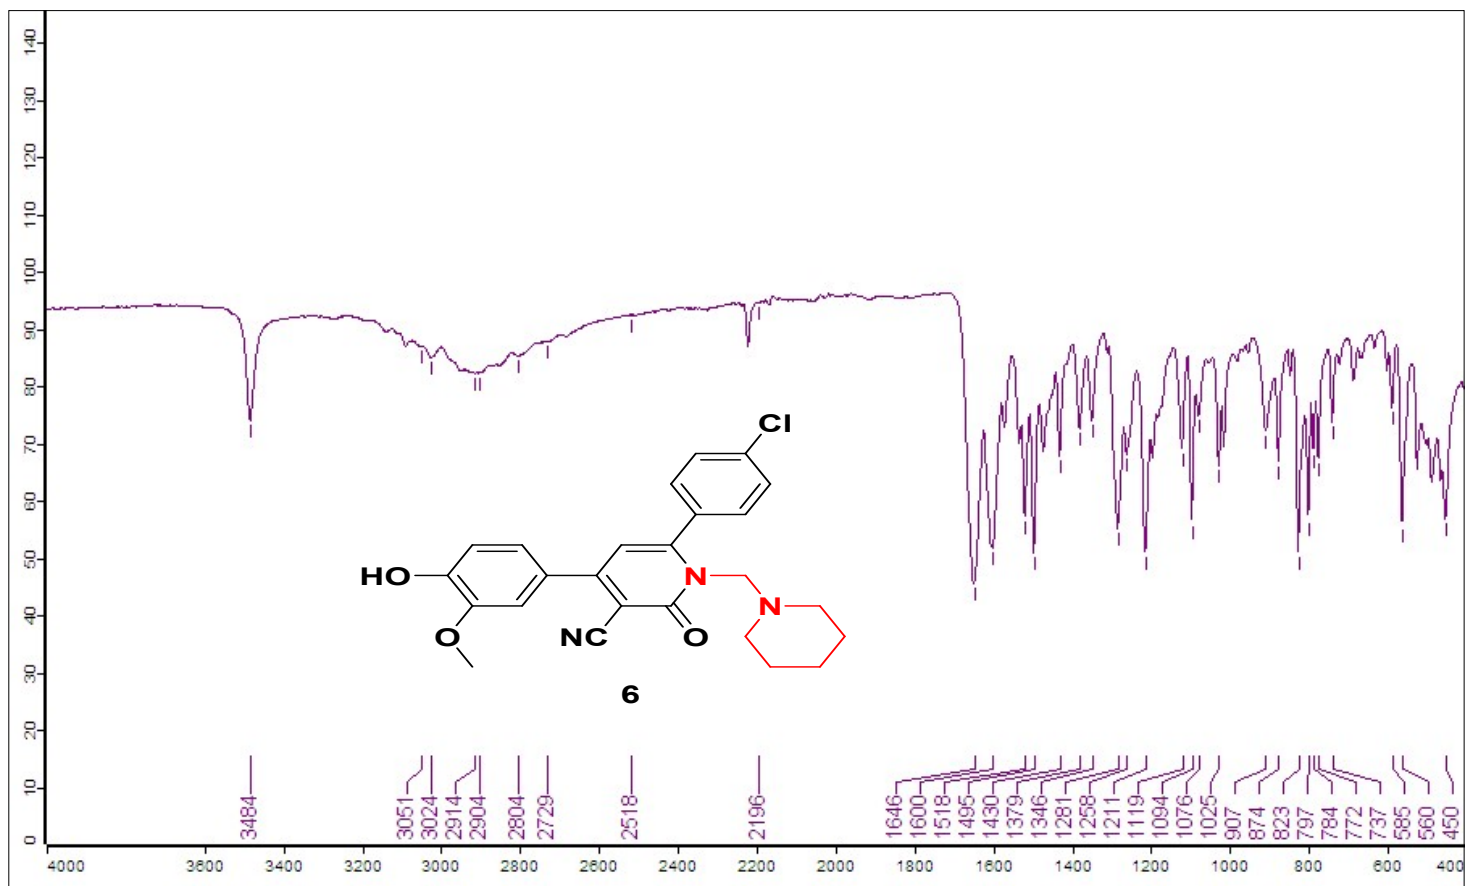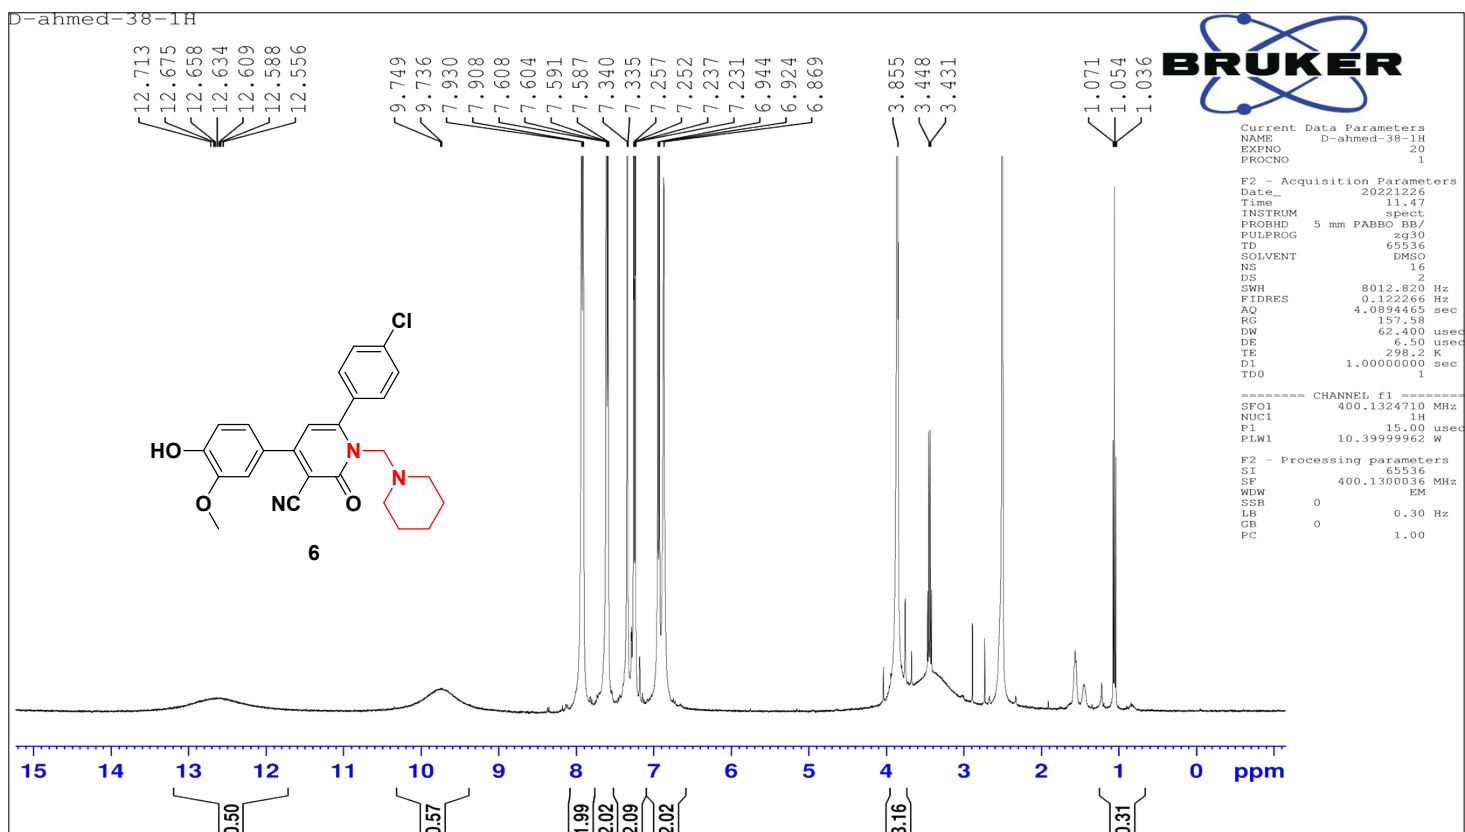

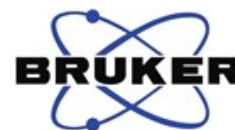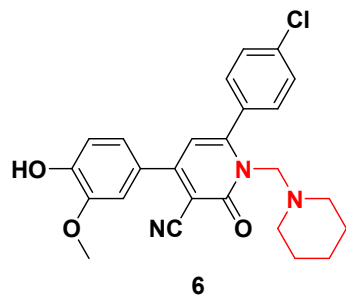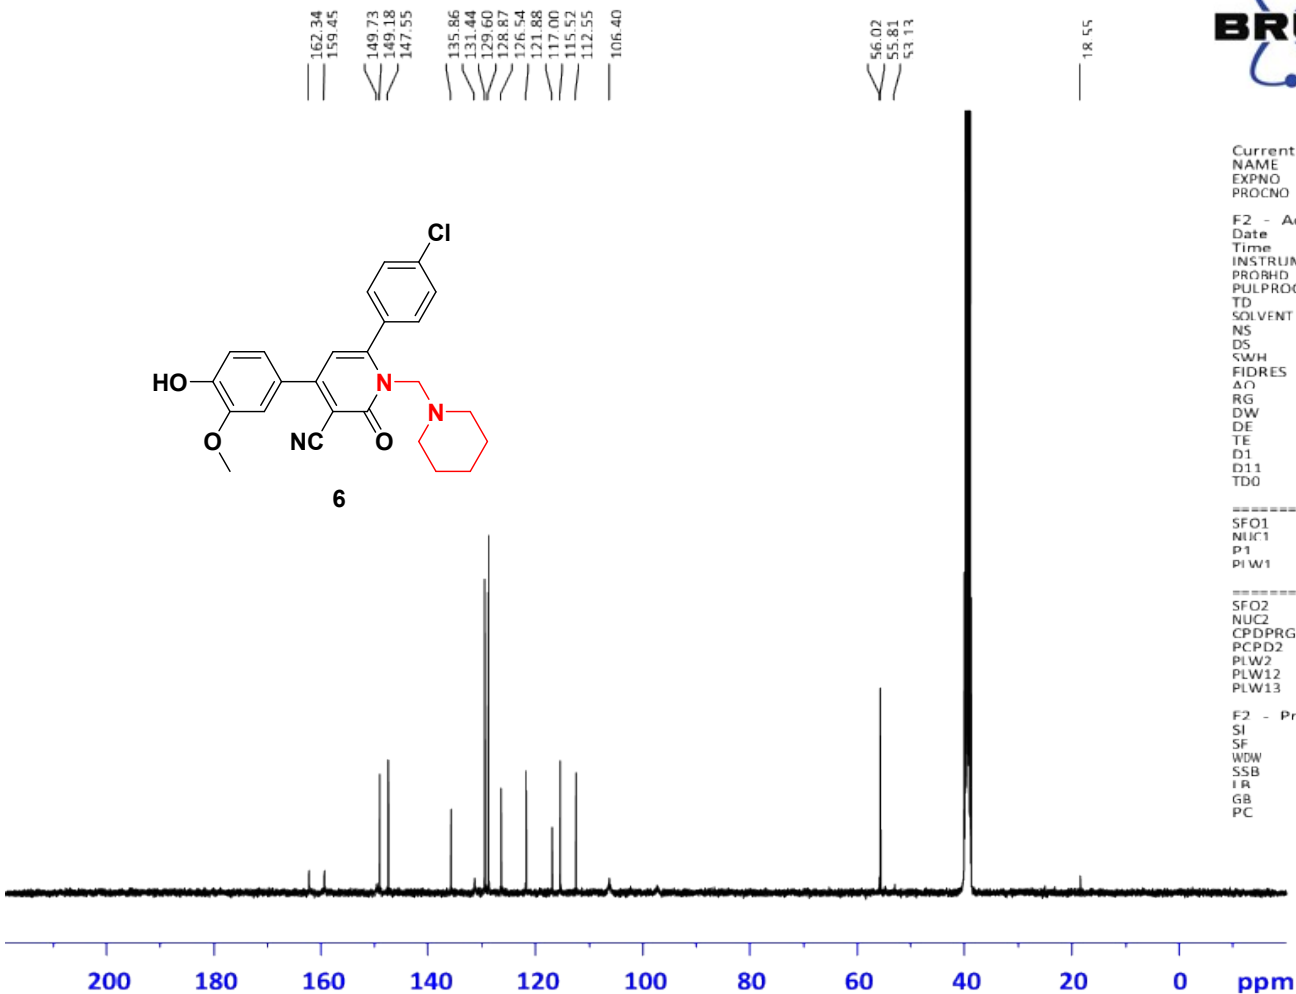

Current Data Parameters  
 NAME D-ahmed-38-c13  
 EXPNO 10  
 PROCNO 1

F2 - Acquisition Parameters  
 Date 20221228  
 Time 6.39  
 INSTRUM spect  
 PROBHD 5 mm PARRO BR/  
 PULPROG zgpg30  
 TD 65536  
 SOLVENT DMSO  
 NS 2000  
 DS 4  
 SWH 74038.461 Hz  
 FIDRES 0.366798 Hz  
 AQ 1.3671488 sec  
 RG 201.61  
 DW 20.800 usec  
 DE 6.50 usec  
 TE 298.2 K  
 D1 2.0000000 sec  
 D11 0.0300000 sec  
 TDO 1

====CHANNEL f1====  
 SFO1 100.6228293 MHz  
 NUC1 13C  
 P1 10.00 usec  
 PLW1 50.0000000 W

====CHANNEL f2====  
 SFO2 400.1316005 MHz  
 NUC2 1H  
 CPDPRG2 waltz16  
 PCPD2 90.00 usec  
 PLW2 10.3999962 W  
 PLW12 0.28889000 W  
 PLW13 0.23400000 W

F2 - Processing parameters  
 SI 32768  
 SF 100.6128167 MHz  
 WDW EM  
 SSB 0  
 FR 1.00 Hz  
 GB 0  
 PC 1.40



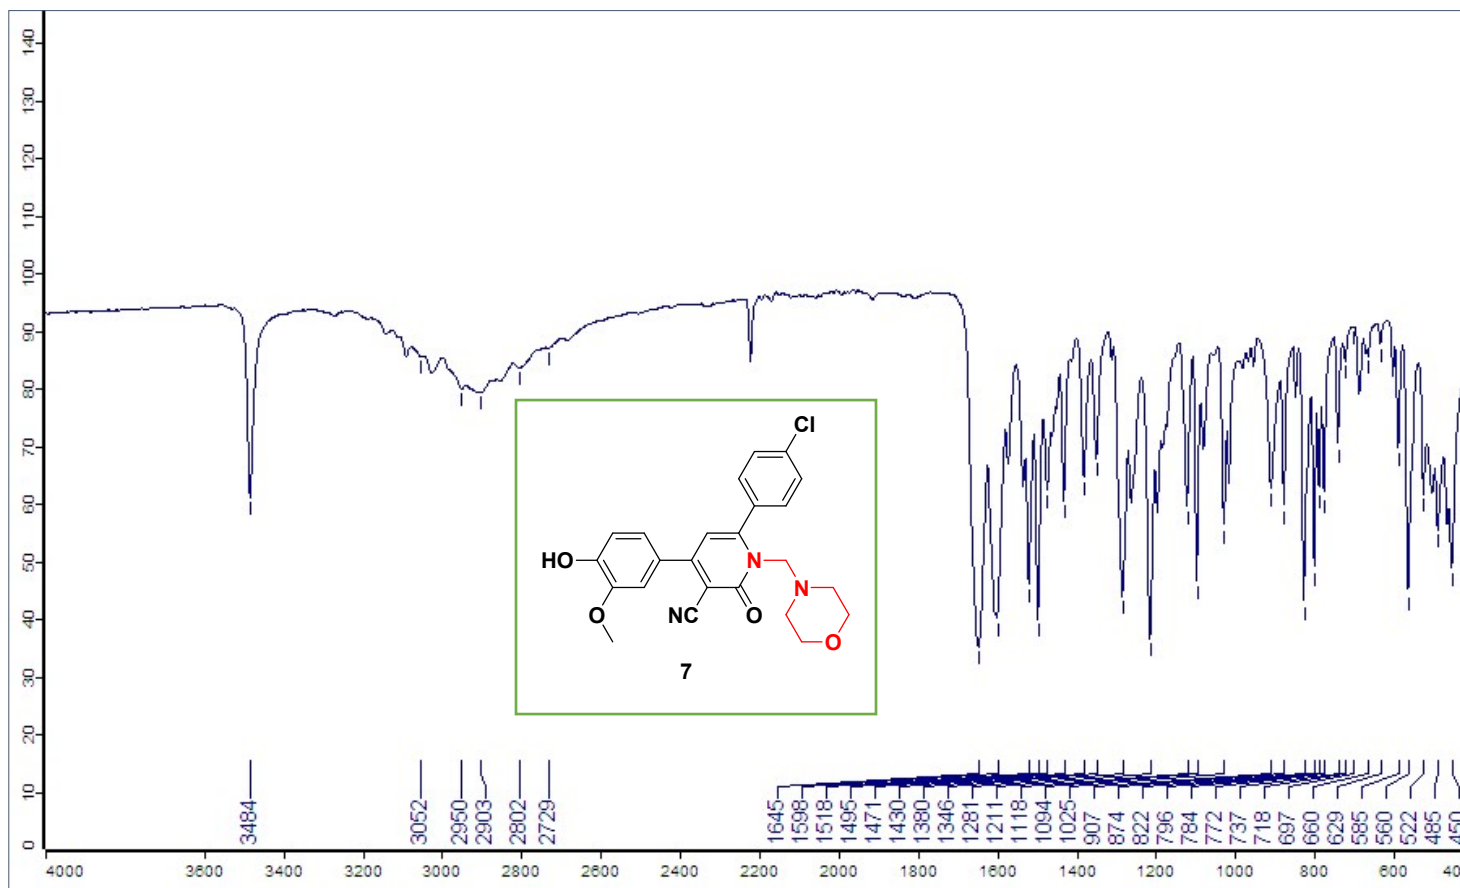

D-ahmed-39-1H

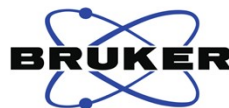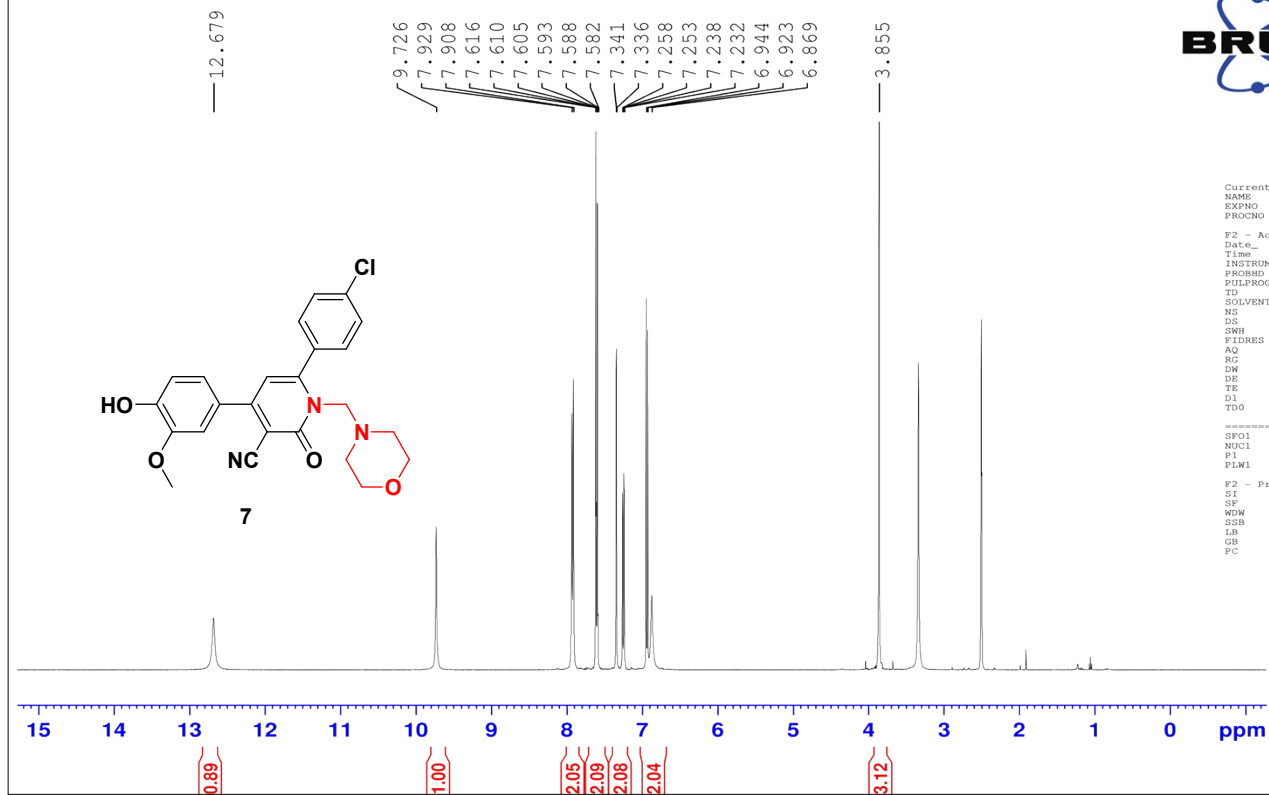

```

Current Data Parameters
NAME      D-ahmed-39-1H
EXPNO    50
PROCNO   1

F2 - Acquisition Parameters
Date_    20221226
Time     11.42
INSTRUM  spect
PROBHD   5 mm PABBO BB/
PULPROG  zg30
TD       65536
SOLVENT  DMSO
NS       16
DS       2
SWH      8012.820 Hz
FIDRES   0.122266 Hz
AQ       4.0894465 sec
RG       180.36
DW       62.400 usec
DE       6.50 usec
TE       298.1 K
D1       1.00000000 sec
TD0      1

===== CHANNEL f1 =====
SF01    400.1324710 MHz
NUC1    1H
P1      15.00 usec
PLW1    10.39999962 W

F2 - Processing parameters
SI      65536
SF      400.130036 MHz
WDW     EM
SSB     0
LB      0.30 Hz
GB      0
PC      1.00
  
```

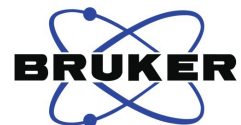

Current Data  
D-ahmed-39

E2 - Acquisition  
Date  
Time  
INSTRUM  
PROBHD 5 mm BARR  
PULPROG  
TD  
SOLVENT  
NS

PC SW/H 24032 461  
FIDRES 0.366708  
AQ 1.3621488

RG 20.800  
RF 6.50

D1 2.00000000  
D11 0.02000000  
TD0

-----CHANNEL1  
SFO1 100.6278793  
NUC1  
P1 10.00  
PLW1 50.00000000

-----CHANNEL2  
SFO2 400.1216005  
NUC2  
P2 2.00000000  
PLW2 10.00000067  
PLW12 0.78880000  
PLW13 0.72400000

E2 - Processing  
S1  
SF 100.6178167  
WDW  
SSB  
GB  
PC

11 11 1111111111 1  
65 44 332222111 0  
29 97 519861657 6

5  
5

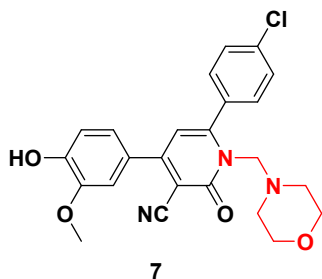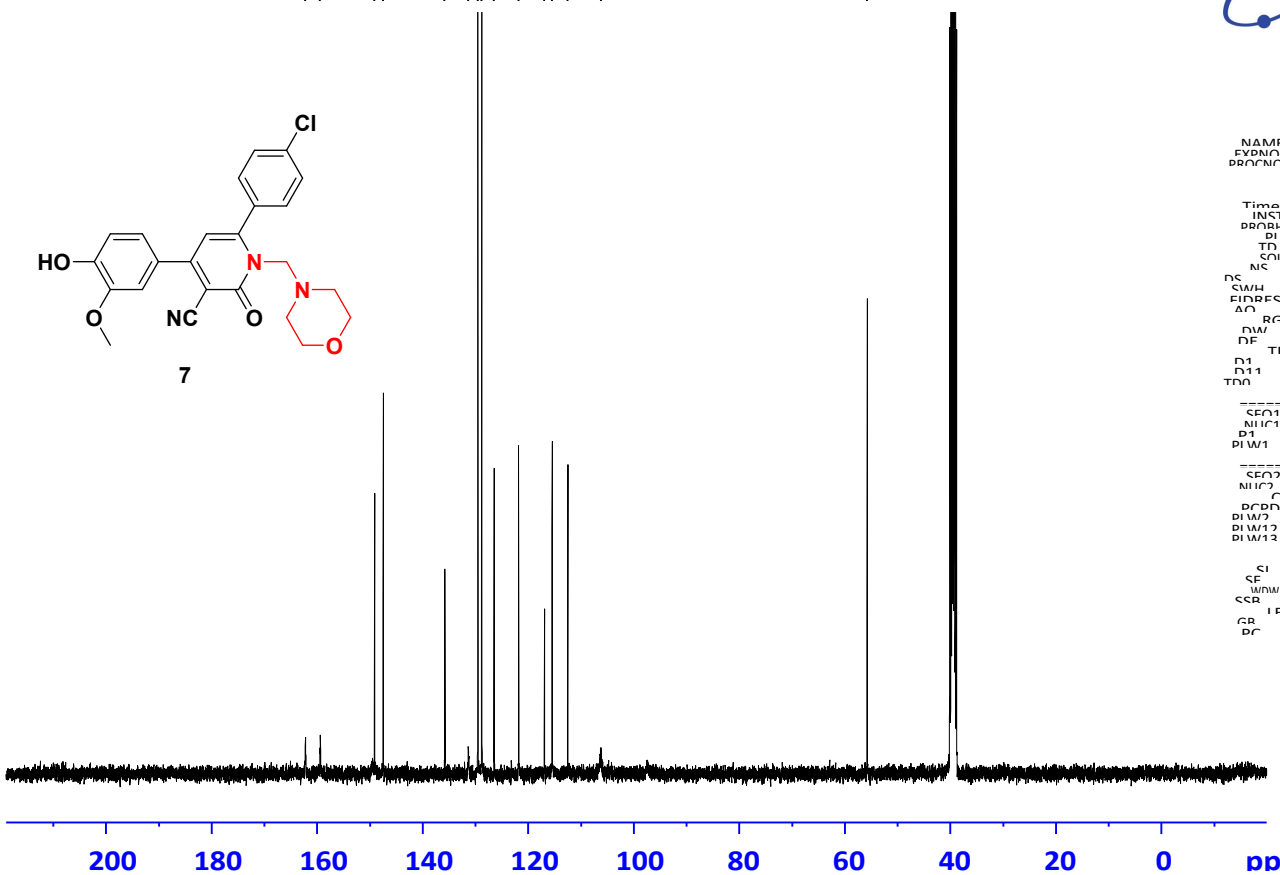

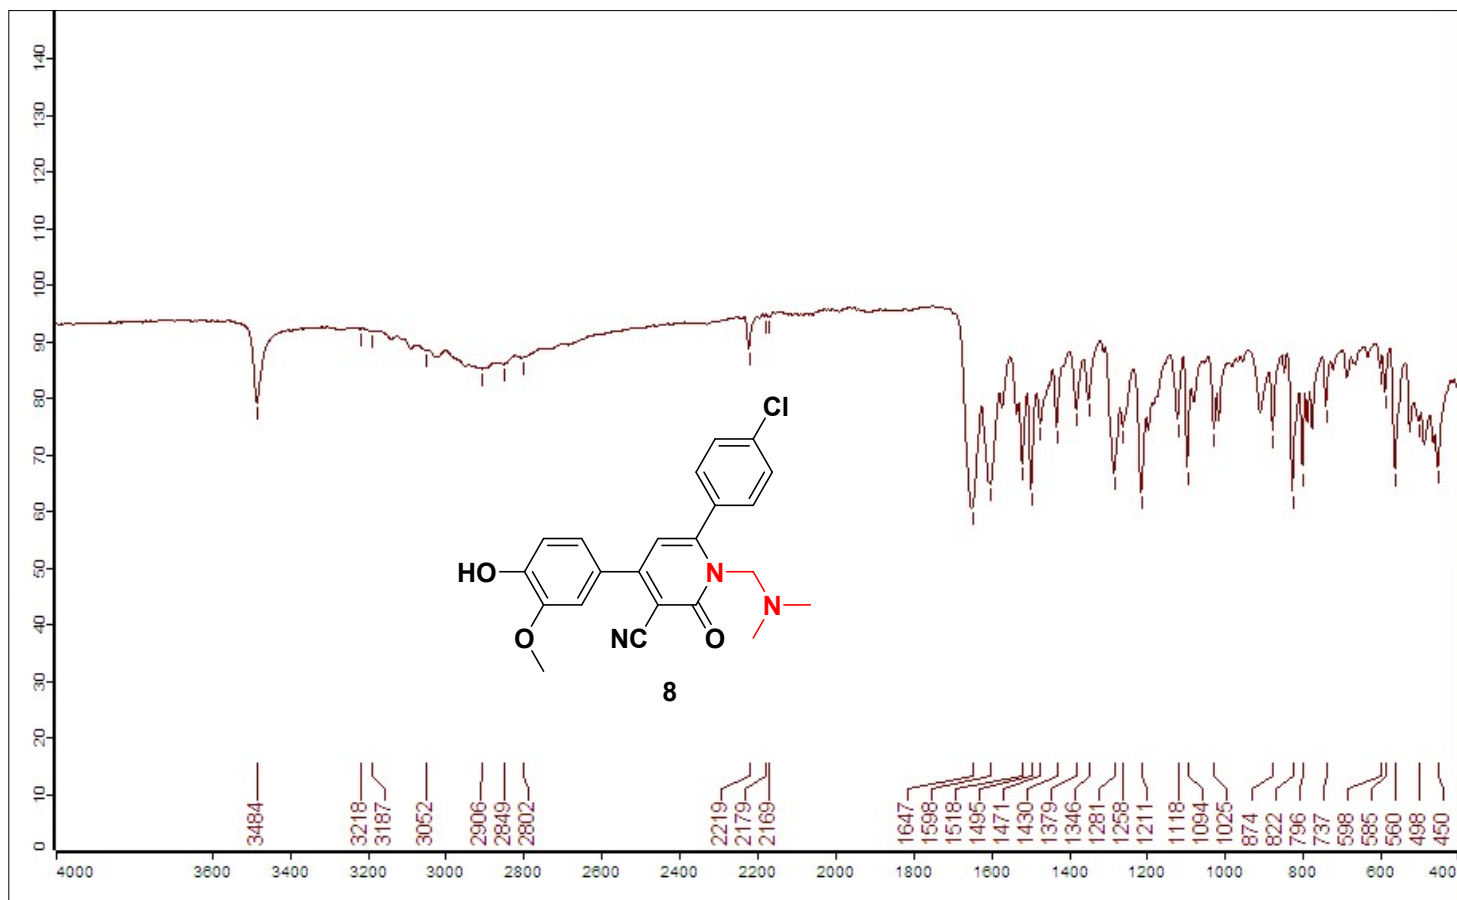

3484

3218

3187

3052

2906

2849

2802

2219

2179

2169

1647

1598

1518

1495

1471

1430

1379

1346

1281

1258

1211

1118

1094

1025

874

822

796

737

598

585

560

498

450

D-ahmed-40-1H

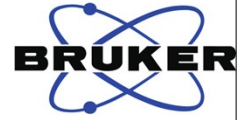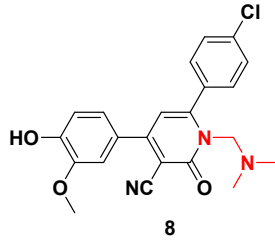

12.645  
12.625  
12.603  
12.599  
12.538

9.808  
9.764  
9.731  
9.692  
7.932  
7.911  
7.614  
7.609  
7.597  
7.592  
7.341  
7.336  
7.259  
7.254  
7.239  
7.233  
6.944  
6.924  
6.872

3.855

1.907  
1.171  
1.072  
1.054  
1.037

Current Data Parameters  
NAME D-ahmed-40-1H  
EXPNO 10  
PROCNO 1

F2 - Acquisition Parameters  
Date\_ 20221226  
Time 11.33  
INSTRUM spect  
PROBHD 5 mm PABBO BB/  
PULPROG zg30  
TD 65536  
SOLVENT DMSO  
NS 16  
DS 2  
SWH 8012.820 Hz  
FIDRES 0.122266 Hz  
AQ 4.0894465 sec  
RG 201.61  
DW 62.400 usec  
DE 6.50 usec  
TE 298.2 K  
D1 1.0000000 sec  
TDO 1

----- CHANNEL f1 -----  
SFO1 400.1324710 MHz  
NUC1 1H  
P1 15.00 usec  
PLW1 10.39999962 W

F2 - Processing parameters  
SI 65536  
SF 400.1300034 MHz  
WDW EM  
SSB 0  
LB 0.30 Hz  
GB 0  
PC 1.00

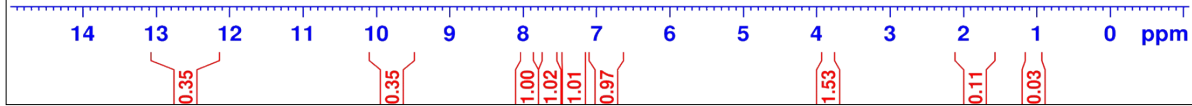

11 11 1 1111111  
 65 44 3 2222111  
 70 07 5 0861657

55 4 21  
 65 8 18  
 V | V

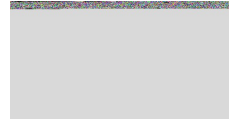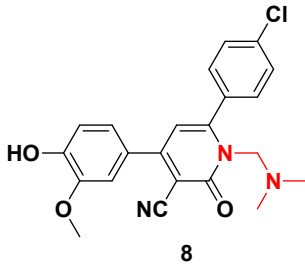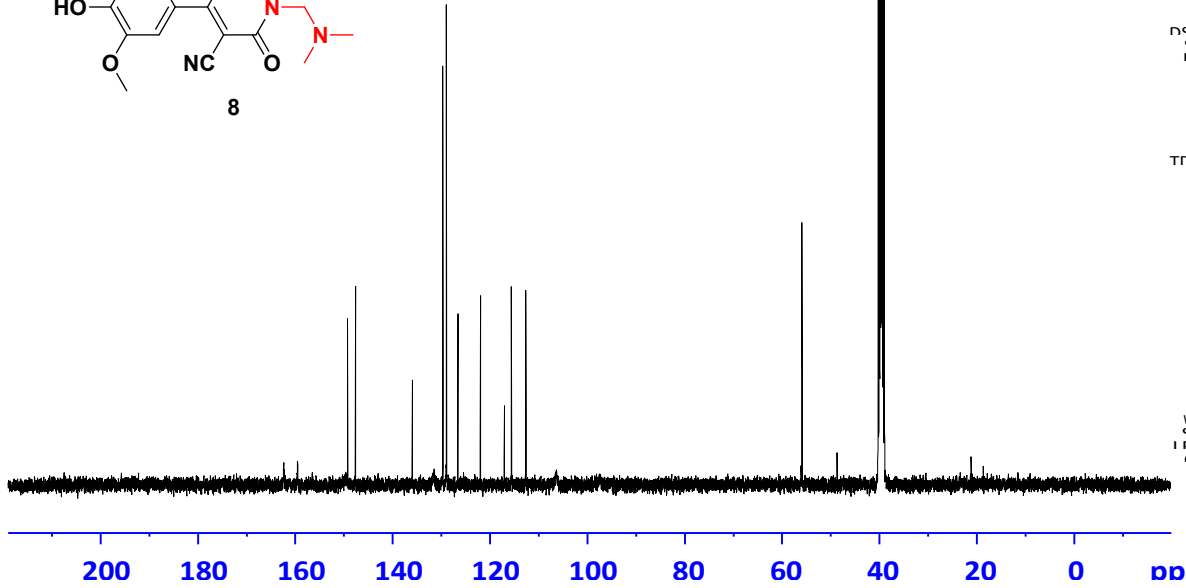

Current Data  
 NAME D-ahmed-40-  
 EXPNO  
 PROCNO  
 F2 - Acquisition  
 Date  
 Time  
 INSTRUM 5 mm PABRA7  
 PRORHD  
 P111 PROG  
 TD  
 SOLVENT  
 NS  
 DC  
 SWH 24038.461  
 FIDRES 0.366798  
 ΔC 1.3631488  
 RG  
 DW 20.800  
 DE 6.50  
 TE  
 D1 2.00000000  
 D11 0.03000000  
 TD0  
 =====CHANNEL1  
 SF01 100.6228293  
 NU1C1  
 P1 1.00000000  
 PI W1 50.00000000  
 =====CHANNEL2  
 SF02 400.1316005  
 NU2C2  
 CPDPRG12  
 PRD02  
 PI W2 10.39999967  
 PI W12 0.28889000  
 PI W13 0.23400000  
 F2 - Processing  
 SI  
 SF 100.6128170  
 WDW FM  
 SSB  
 I R 1.00  
 CR  
 PC

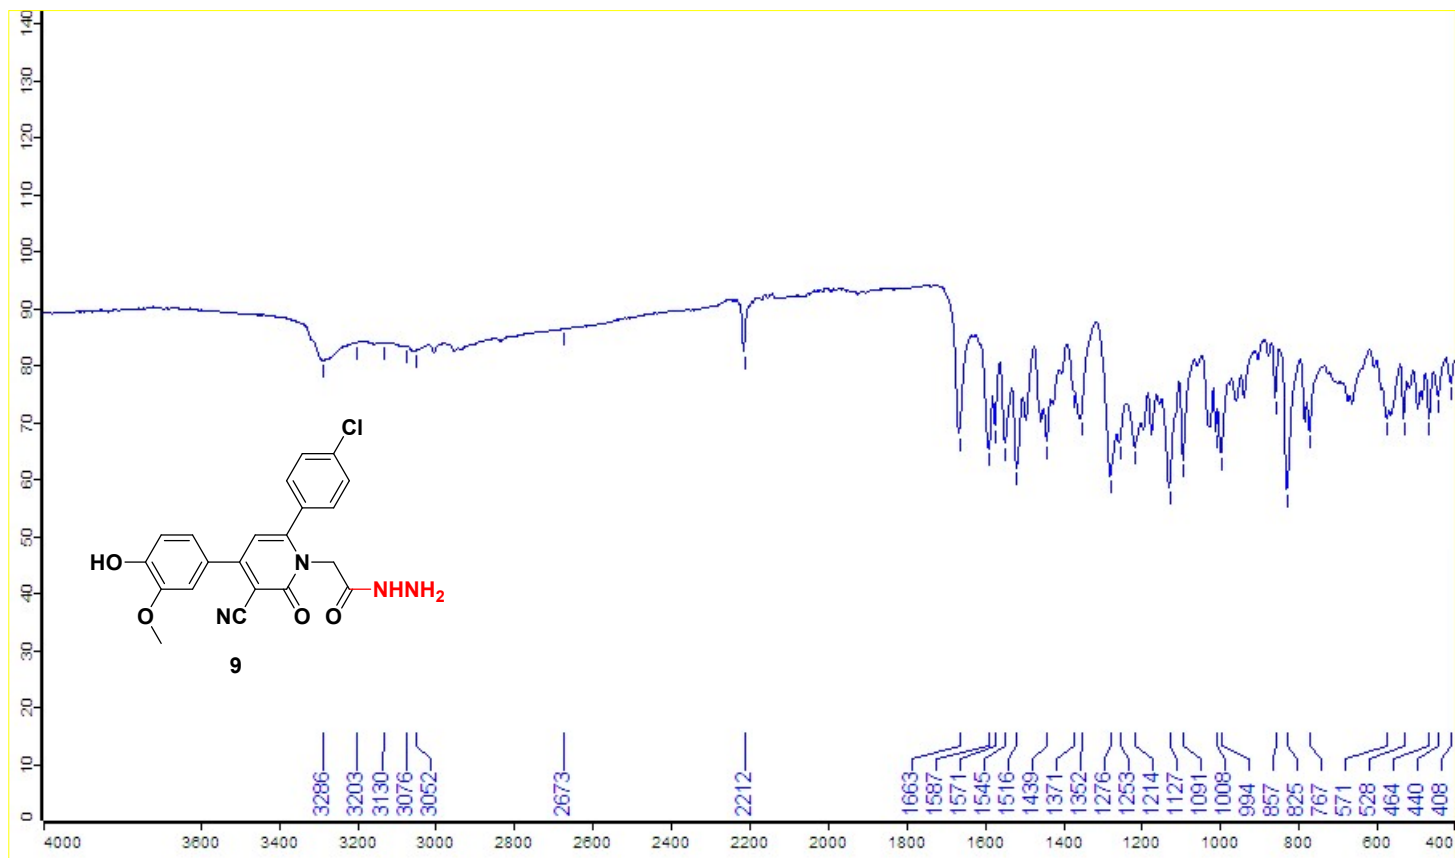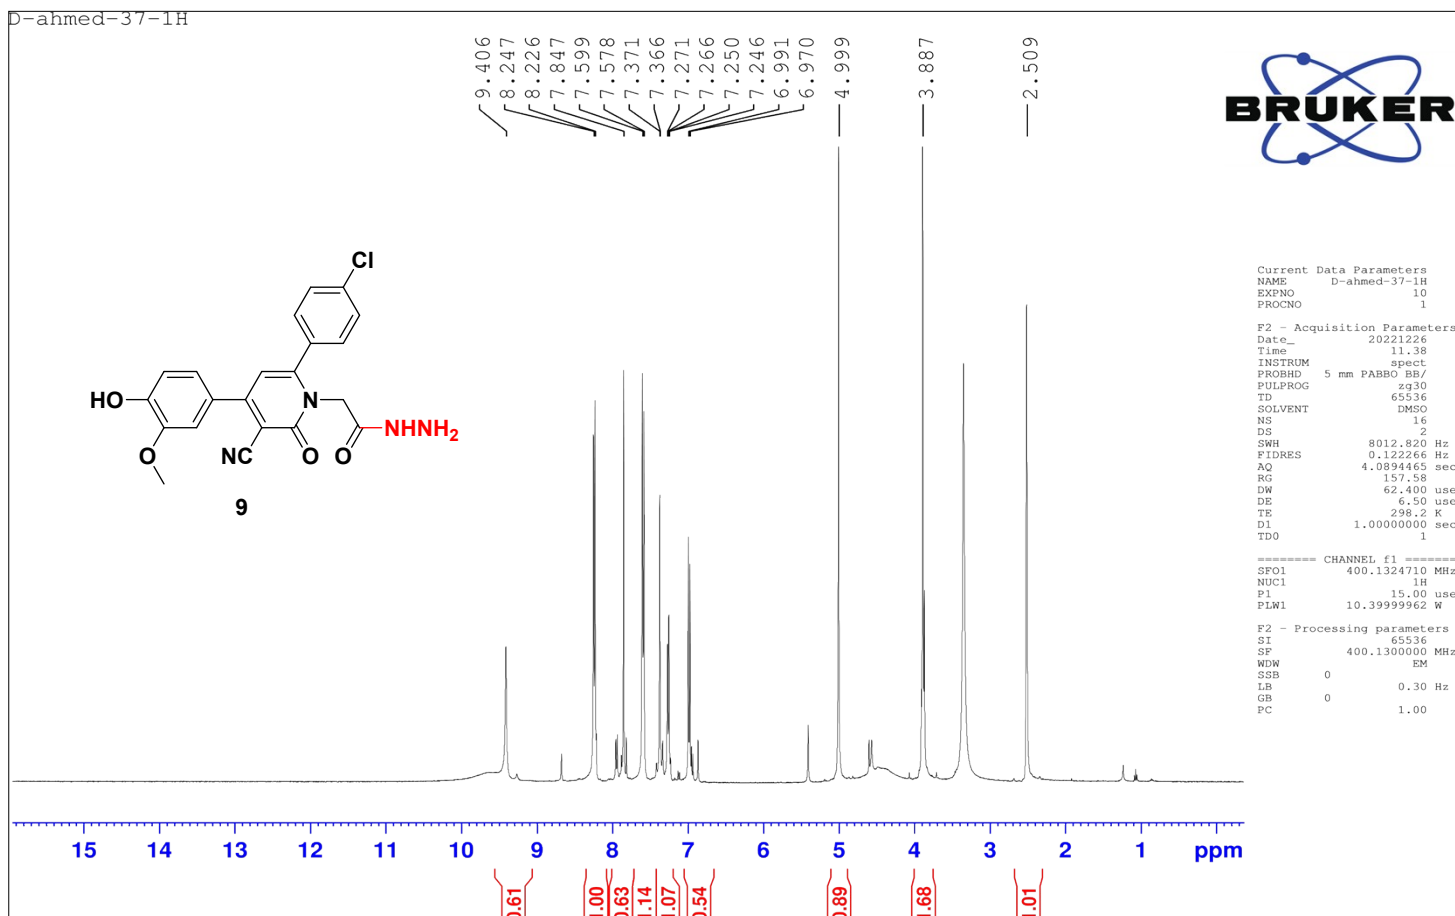

D-Ahmed-37-d2o

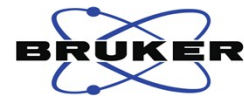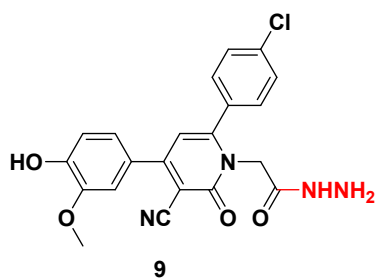

Current Data Parameters  
NAME D-Ahmed-37-d2o  
EXPNO 10  
PROCNO 1

F2 - Acquisition Parameters  
Date\_ 20230103  
Time 12.26  
INSTRUM spect  
PROBHD 5 mm PABBO BB/  
PULPROG zg30  
TD 65536  
SOLVENT DMSO  
NS 16  
DS 2  
SWH 8012.820 Hz  
FIDRES 0.122266 Hz  
AQ 4.0894465 sec  
RG 143.63  
DW 62.400 usec  
DE 6.50 usec  
TE 298.1 K  
D1 1.0000000 sec  
TD0 1

----- CHANNEL f1 -----  
SFO1 400.1324710 MHz  
NUC1 1H  
P1 15.00 usec  
PLW1 10.39999962 W

F2 - Processing parameters  
SI 65536  
SF 400.1300041 MHz  
WDW EM  
SSB 0  
LB 0.30 Hz  
GB 0  
PC 1.00

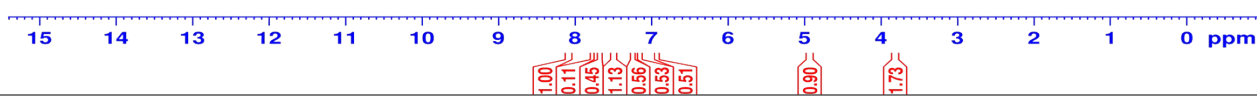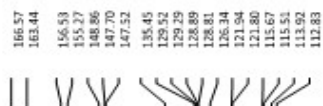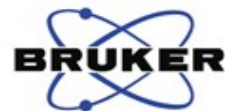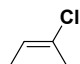

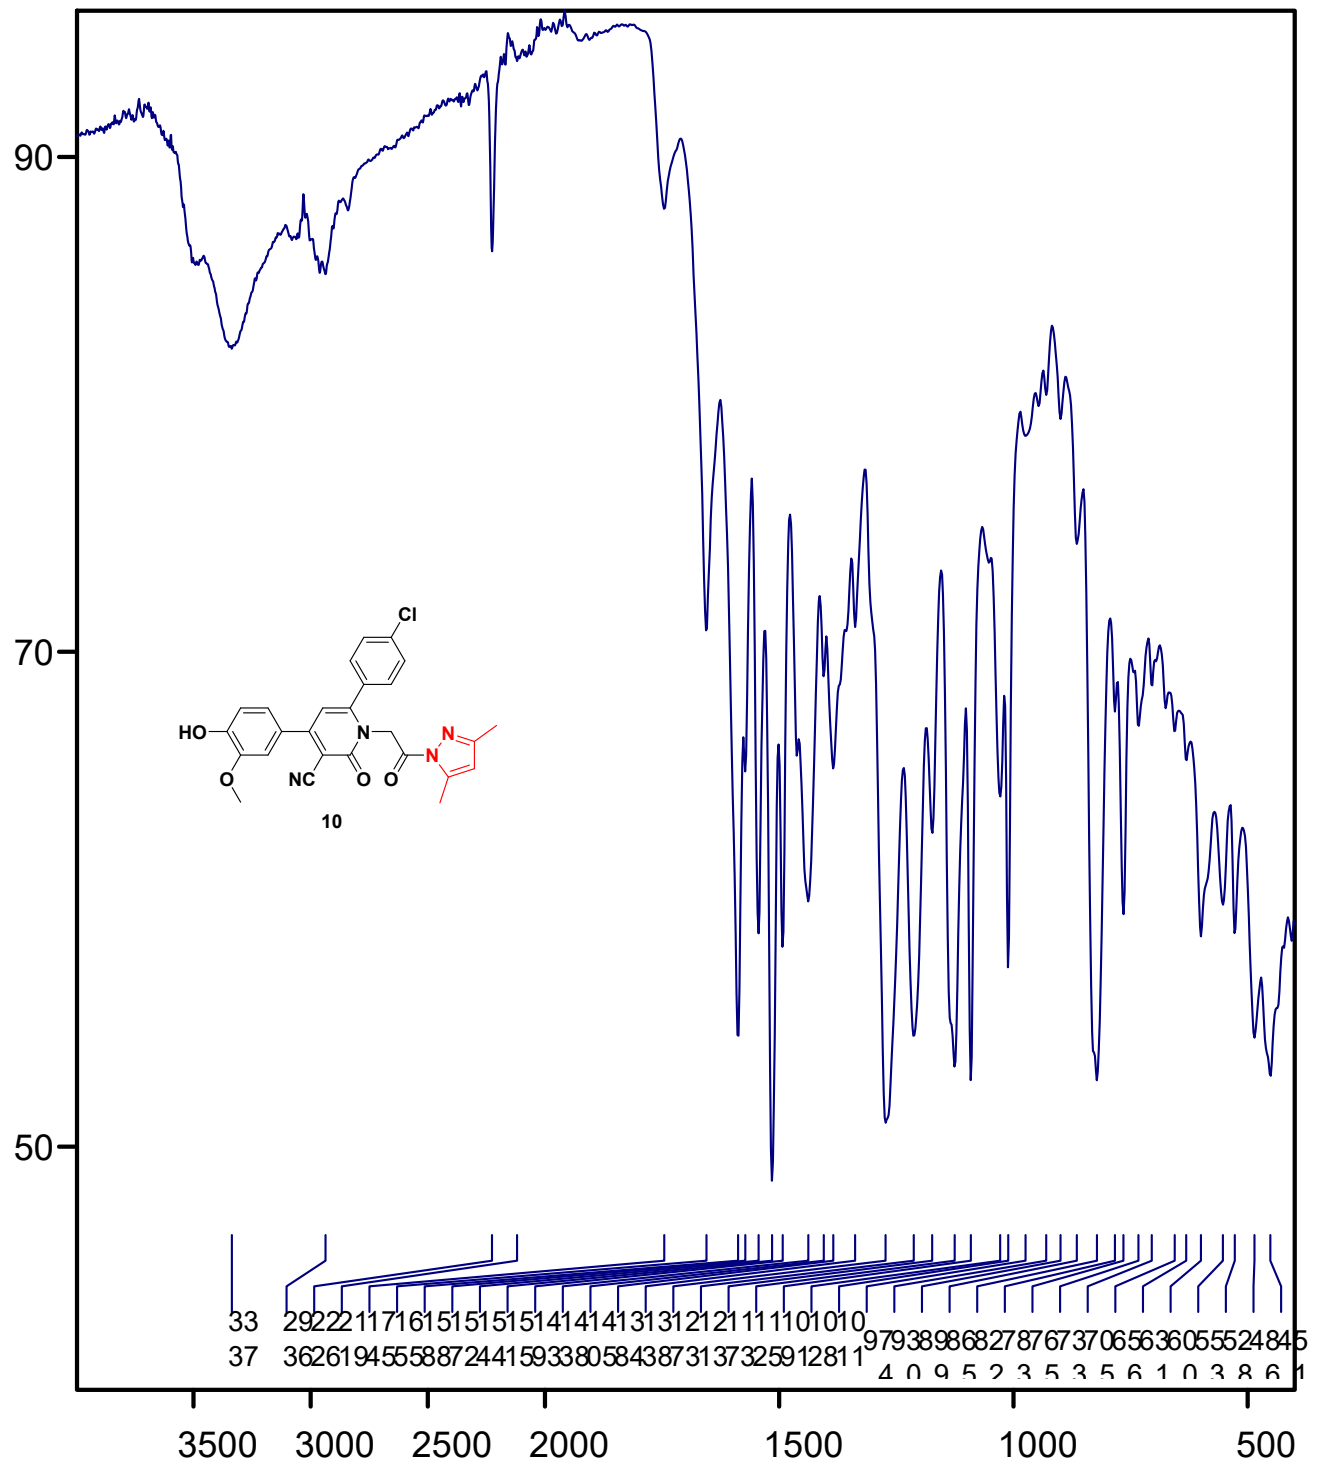



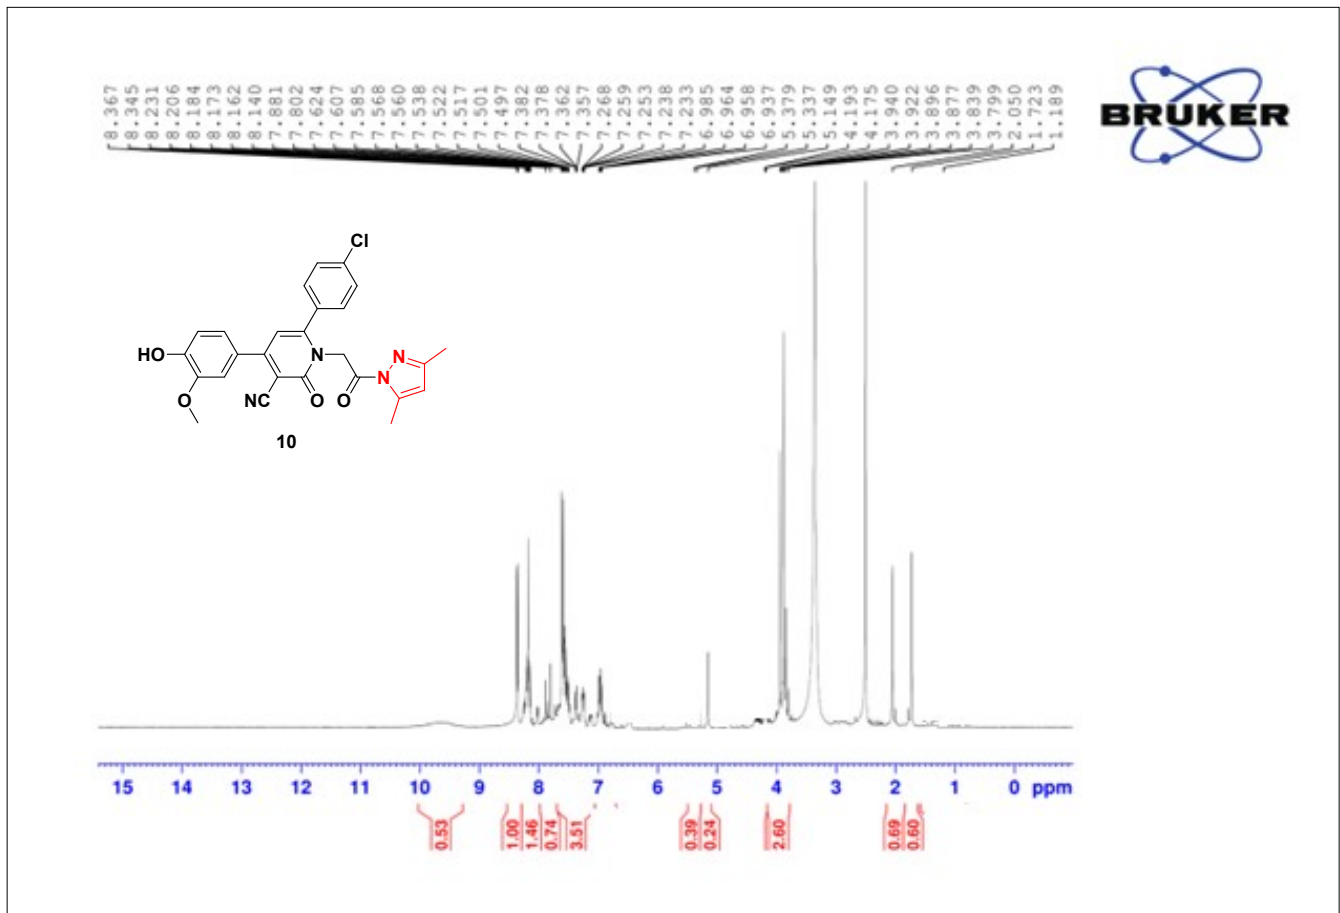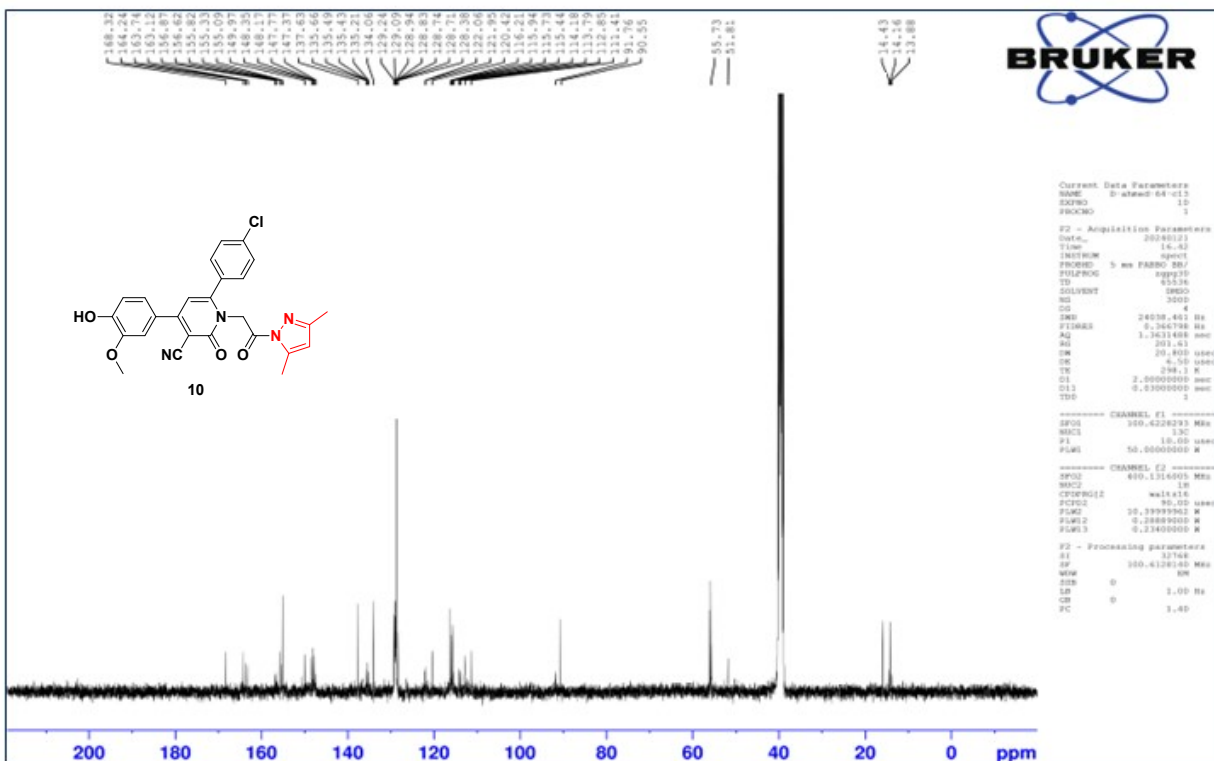

Current Data Parameters

NAME: D:\shw04\015

EXPNO: 10

PROCNO: 1

F2 - Acquisition Parameters

Date\_: 20240121

Time: 16.42

INSTRUM: spect

PROBHD: 5 mm PABBO 50/

PULPROG: zgpg30

TD: 65536

SOLVENT: DMSO

NS: 3000

DS: 4

SWH: 24038.402 Hz

FIDRES: 0.346708 Hz

AQ: 1.3631488 sec

RG: 201.43

SM: 20.800 usec

DM: 4.50 usec

TE: 298.2 K

DE: 2.0000000 sec

DELTA: 0.0300000 sec

TDS: 3

===== CHANNEL F1 =====

NUC1: 13C

NUC2: 13C

PC1: 10.00 usec

PLW1: 50.00000000 M

===== CHANNEL F2 =====

NUC1: 13C

NUC2: 13C

PC1: 10.00 usec

PLW1: 50.00000000 M

PLW2: 10.39999902 M

PLW3: 0.23400000 M

PLW4: 0.23400000 M

F2 - Processing parameters

SI: 32768

SF: 100.6261000 MHz

WDW: RM

SSB: 0

LB: 1.00 Hz

GB: 0

PC: 1.40

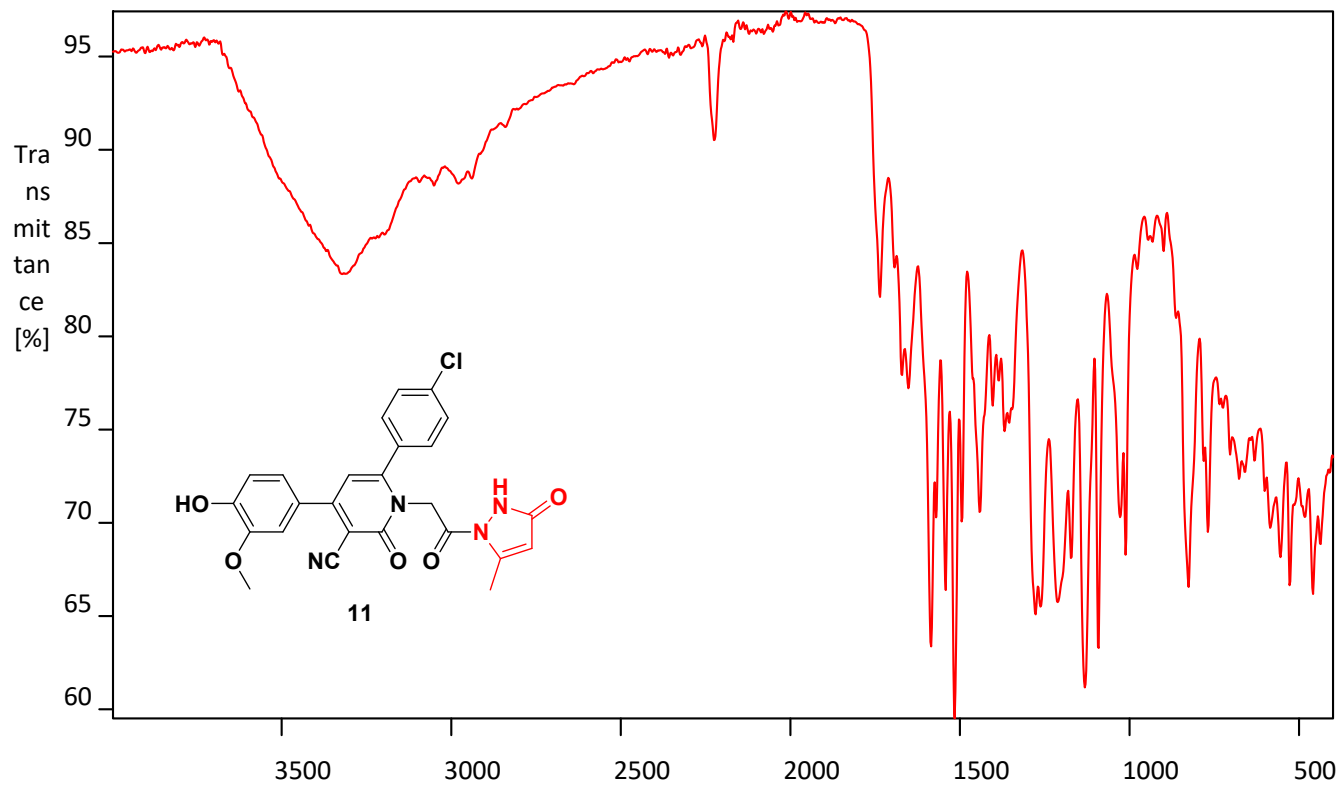

D-ahmed-65-1H

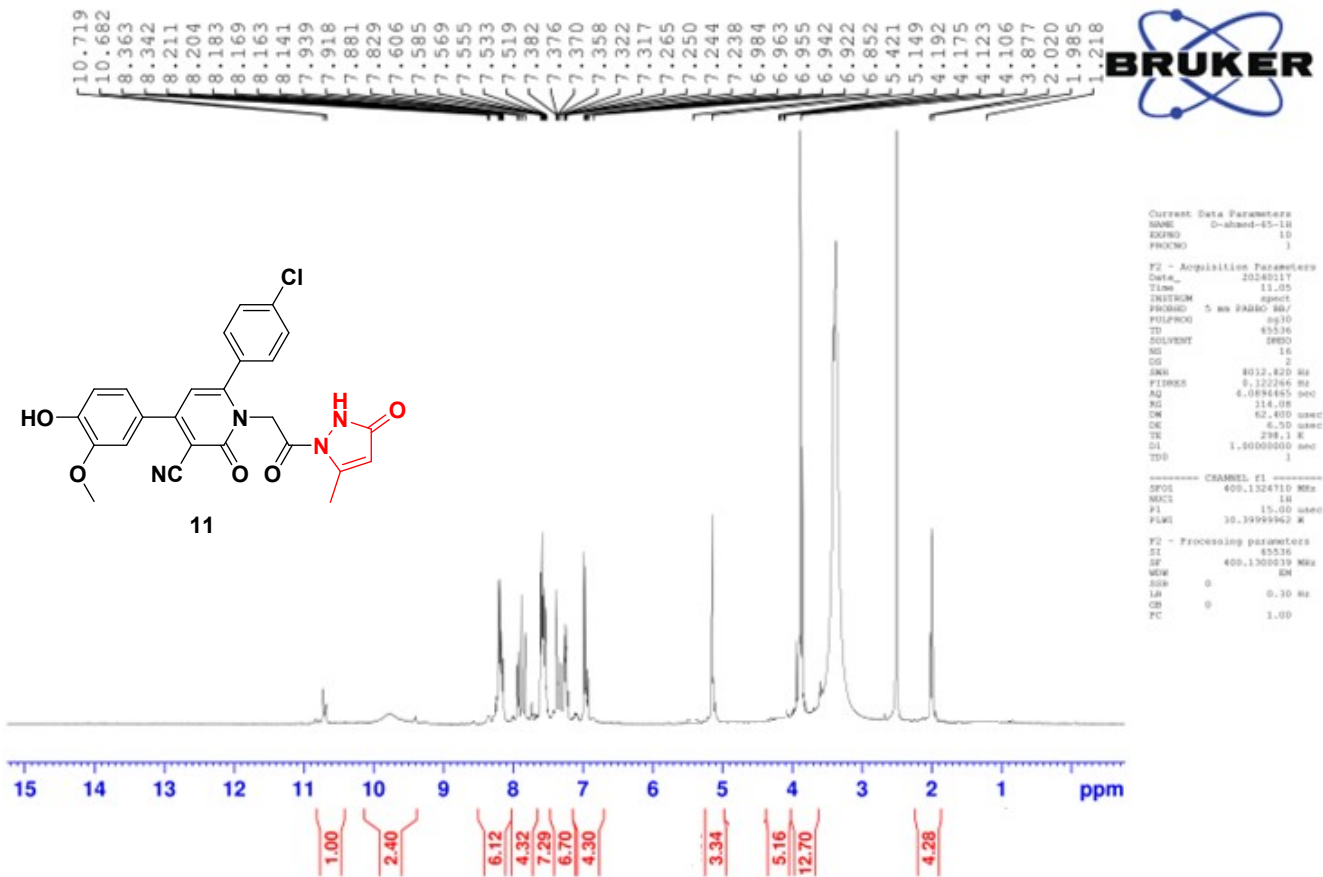

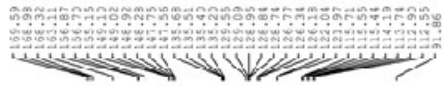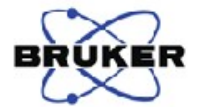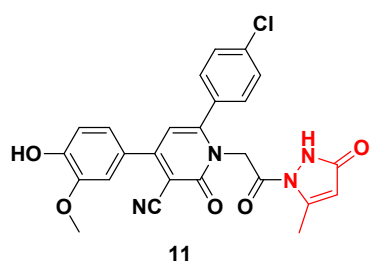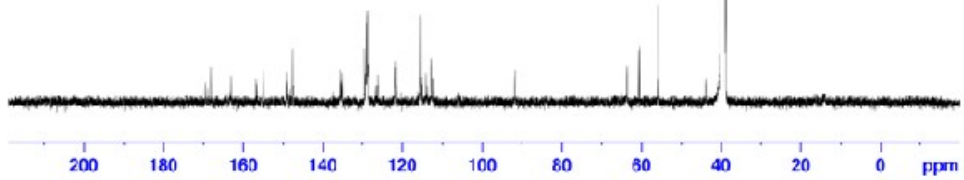

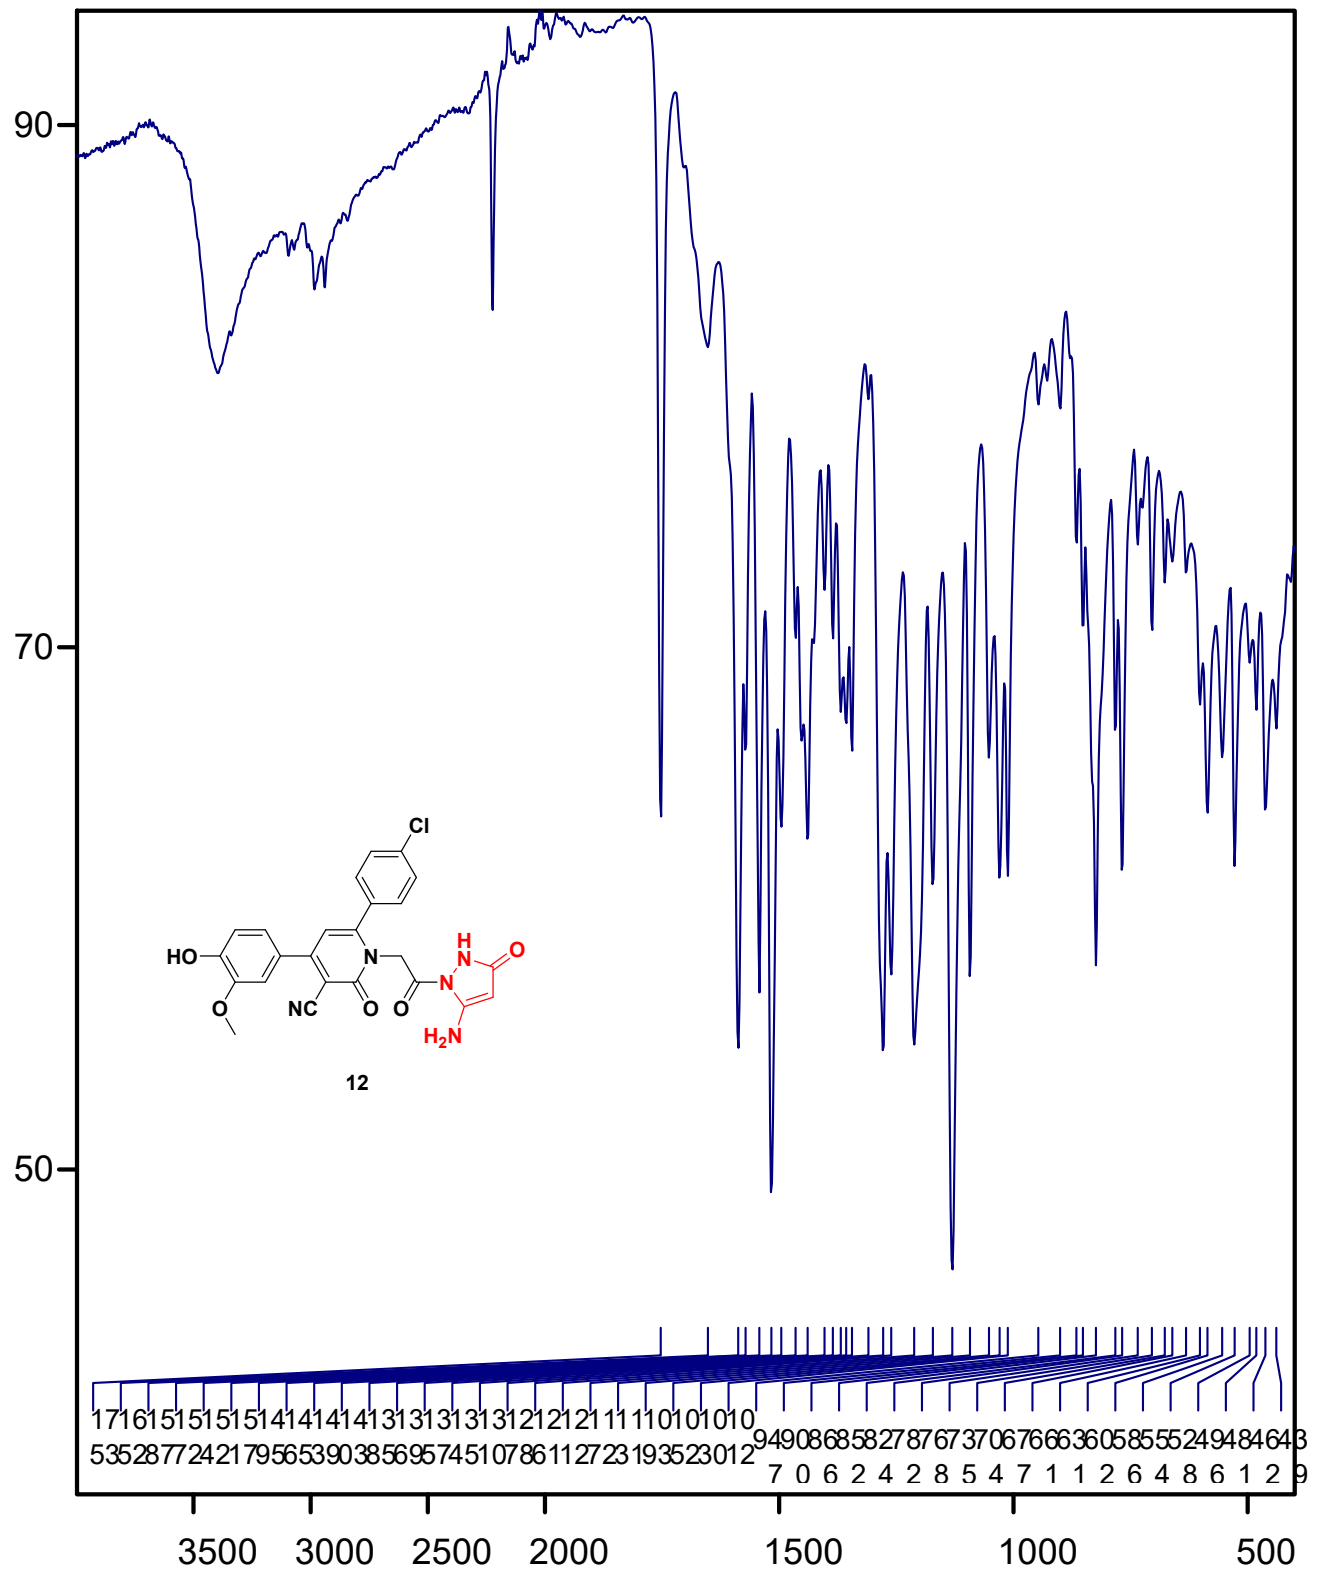

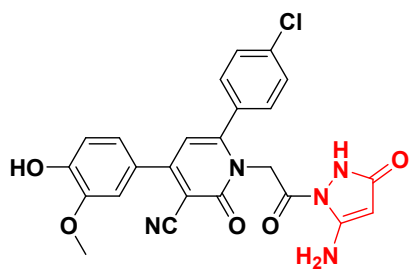

12

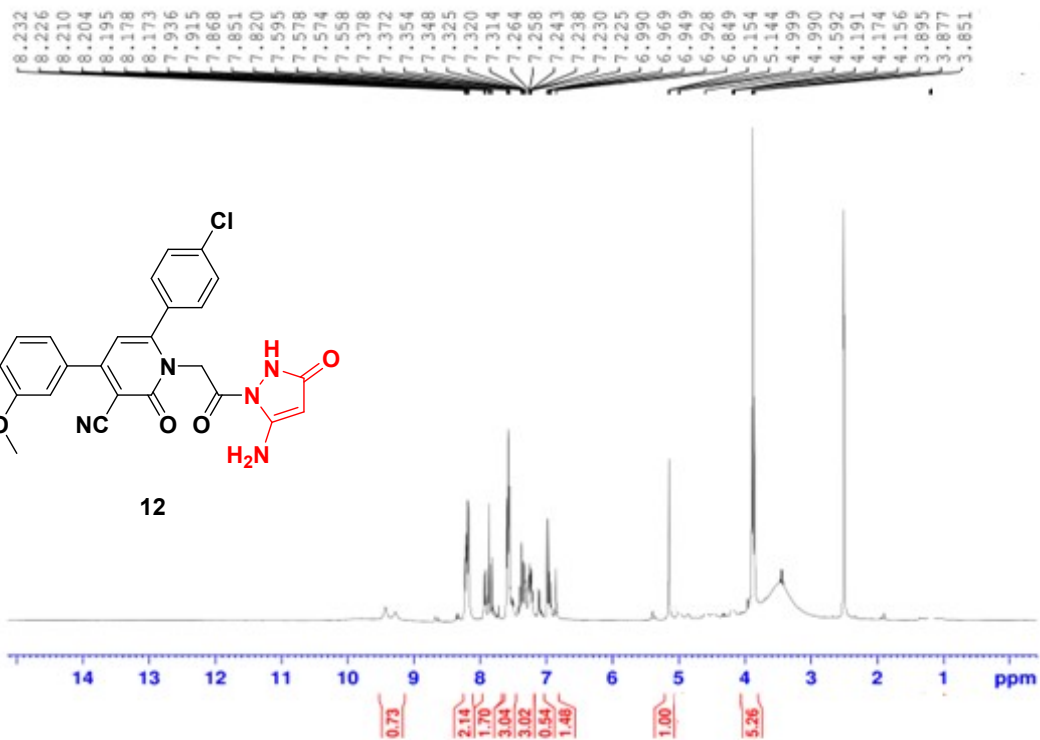

168.32  
166.62  
166.51  
163.46  
163.39  
163.10  
156.85  
156.54  
156.15  
155.47  
155.29  
155.12  
149.15  
149.02  
148.99  
147.76  
147.75  
147.56  
147.56  
139.61  
139.56  
139.46  
139.38  
139.18  
129.52  
129.33  
129.29  
129.07  
128.92  
128.81  
128.76  
126.77  
126.29  
126.13  
122.04  
121.96  
121.82  
121.43  
117.43  
115.72  
115.56  
115.44  
114.16  
113.91  
113.56  
112.89  
112.83  
112.70  
110.55  
110.52  
102.58  
82.27  
81.84  
87.03  
84.33  
63.71  
60.77  
55.86

14.16

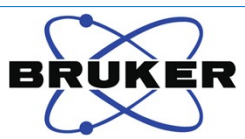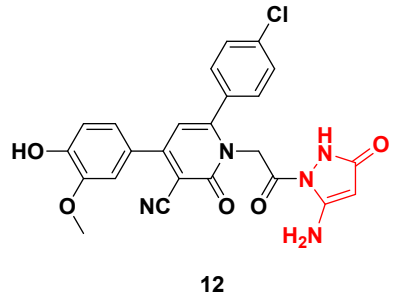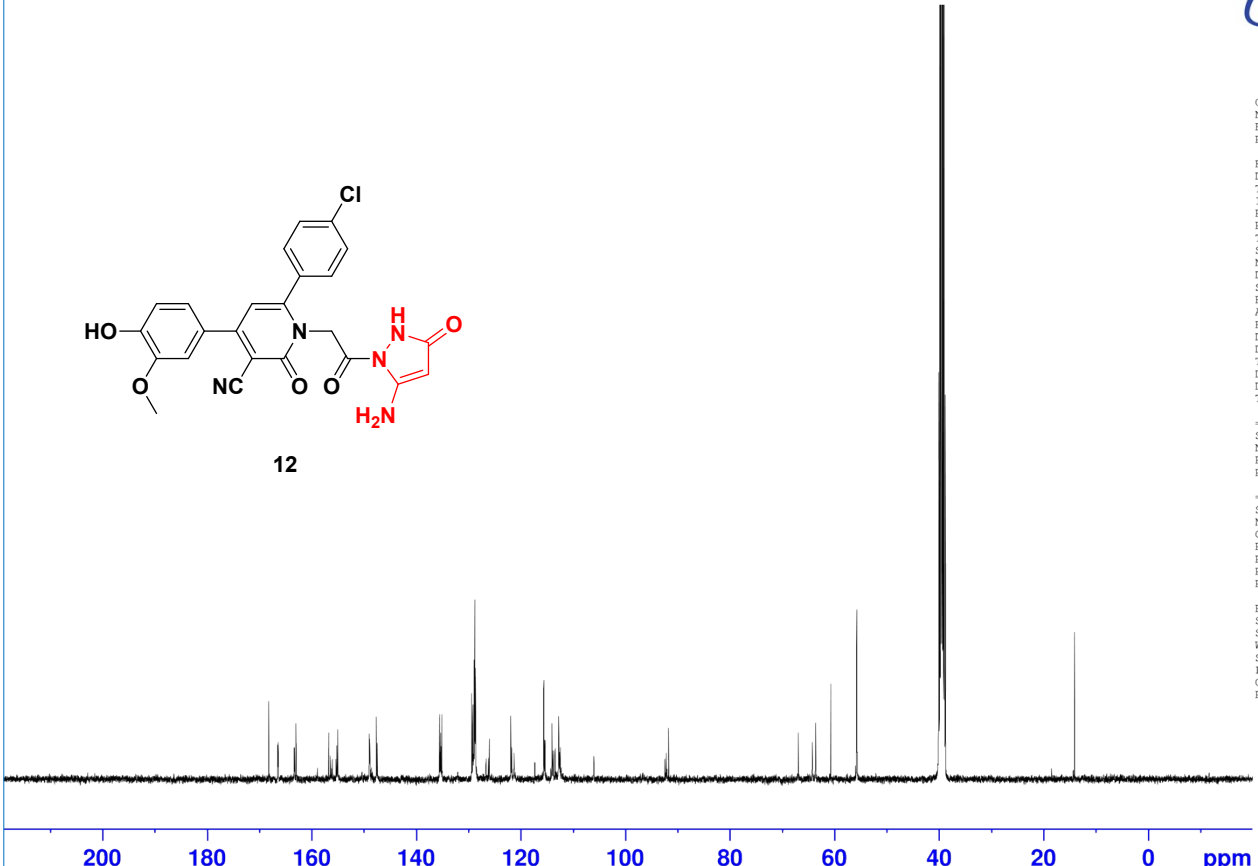

Current Data Parameters  
NAME D-ahmed-66-cl3  
EXPNO 11  
PROCNO 1

F2 - Acquisition Parameters  
Date\_ 20240123  
Time 22.07  
INSTRUM spect  
PROBHD 5 mm PABBO BB/  
PULPROG zgpg30  
TD 65536  
SOLVENT DMSO  
NS 3000  
DS 4  
SWH 24038.461 Hz  
FIDRES 0.366798 Hz  
AQ 1.3631488 sec  
RG 201.61  
DW 20.800 usec  
DE 6.50 usec  
TE 298.2 K  
D1 2.0000000 sec  
D11 0.0300000 sec  
TD0 1

===== CHANNEL f1 =====  
SFO1 100.6228293 MHz  
NUC1 13C  
P1 10.00 usec  
PLW1 50.0000000 W

===== CHANNEL f2 =====  
SFO2 400.1316005 MHz  
NUC2 1H  
CPDPRG[2] waltz16  
PCPD2 90.00 usec  
PLW2 10.3999962 W  
PLW12 0.2888900 W  
PLW13 0.2340000 W

F2 - Processing parameters  
SI 32768  
SF 100.6128136 MHz  
WDW EM  
SSB 0  
LB 1.00 Hz  
GB 0  
PC 1.40

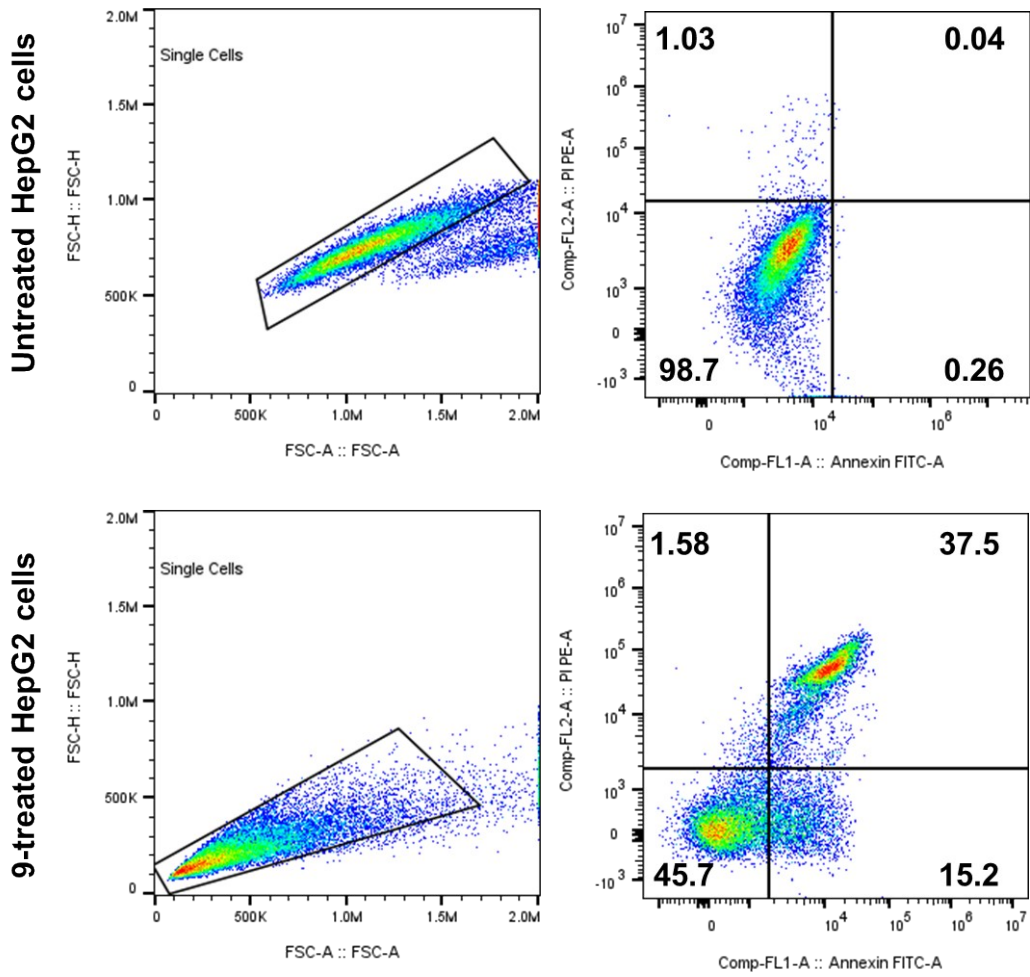

Fig. of flow cytometry results of apoptosis and necrosis assessment using Annexin V/PI staining.
